# Supplementary material
Source: publisher figshare collection journal article supplement (https://acs.figshare.com/ndownloader/files/4544944)
Supplement: Supplementary file 1 [file 4544944]

data_publication_text
_publ_requested_journal          'J. Am. Chem. Soc.'
_publ_contact_author_name        'Sevov, S. C.'
_publ_contact_author_address     
;Department of Chemistry and Biochemistry
251 Nieuwland Science Hall
University of Notre Dame
Notre Dame, Indiana 46556
;
_publ_contact_author_email       ssevov@nd.edu
loop_
_publ_author_name
_publ_author_address
'Sevov, S. C.'
;Department of Chemistry and Biochemistry
251 Nieuwland Science Hall
University of Notre Dame
Notre Dame, Indiana 46556
;
'Hull, M. W.'
;Department of Chemistry and Biochemistry
251 Nieuwland Science Hall
University of Notre Dame
Notre Dame, Indiana 46556
;


 
data_ge9-methylcyclopropane
 
_audit_creation_method            SHELXL-97
_chemical_name_systematic
;
 (K-crypt)2[Ge9-(CH2CH(CH2)2)2] 3en
;
_chemical_name_common             ?
_chemical_melting_point           ?
_chemical_formula_moiety          
;
 2(C18 H36 K N2 O6 ), C8 H14 Ge9, 3(C2 N2)
;
_chemical_formula_sum
 'C50 H86 Ge9 K2 N10 O12'
_chemical_formula_weight          1750.98
 
loop_
 _atom_type_symbol
 _atom_type_description
 _atom_type_scat_dispersion_real
 _atom_type_scat_dispersion_imag
 _atom_type_scat_source
 'C'  'C'   0.0033   0.0016
 'International Tables Vol C Tables 4.2.6.8 and 6.1.1.4'
 'H'  'H'   0.0000   0.0000
 'International Tables Vol C Tables 4.2.6.8 and 6.1.1.4'
 'N'  'N'   0.0061   0.0033
 'International Tables Vol C Tables 4.2.6.8 and 6.1.1.4'
 'O'  'O'   0.0106   0.0060
 'International Tables Vol C Tables 4.2.6.8 and 6.1.1.4'
 'K'  'K'   0.2009   0.2494
 'International Tables Vol C Tables 4.2.6.8 and 6.1.1.4'
 'Ge'  'Ge'   0.1547   1.8001
 'International Tables Vol C Tables 4.2.6.8 and 6.1.1.4'
 
_symmetry_cell_setting            Monoclinic
_symmetry_space_group_name_H-M    P2(1)/n
 
loop_
 _symmetry_equiv_pos_as_xyz
 'x, y, z'
 '-x+1/2, y+1/2, -z+1/2'
 '-x, -y, -z'
 'x-1/2, -y-1/2, z-1/2'
 
_cell_length_a                    14.9391(3)
_cell_length_b                    25.7127(5)
_cell_length_c                    19.0906(4)
_cell_angle_alpha                 90.00
_cell_angle_beta                  93.8900(10)
_cell_angle_gamma                 90.00
_cell_volume                      7316.3(3)
_cell_formula_units_Z             4
_cell_measurement_temperature     100(2)
_cell_measurement_reflns_used     ?
_cell_measurement_theta_min       ?
_cell_measurement_theta_max       ?
 
_exptl_crystal_description        'parallelepiped'
_exptl_crystal_colour             'orange'
_exptl_crystal_size_max           0.56
_exptl_crystal_size_mid           0.54
_exptl_crystal_size_min           0.33
_exptl_crystal_density_meas       ?
_exptl_crystal_density_diffrn     1.590
_exptl_crystal_density_method     'not measured'
_exptl_crystal_F_000              3526
_exptl_absorpt_coefficient_mu     3.813
_exptl_absorpt_correction_type    'multi-scan'
_exptl_absorpt_correction_T_min   0.136
_exptl_absorpt_correction_T_max   0.284
_exptl_absorpt_process_details    'SADABS'
 
_exptl_special_details
;
 ?
;
 
_diffrn_ambient_temperature       100(2)
_diffrn_radiation_wavelength      0.71073
_diffrn_radiation_type            MoK\a
_diffrn_radiation_source          'fine-focus sealed tube'
_diffrn_radiation_monochromator   graphite
_diffrn_measurement_device_type   'CCD Area Detector'
_diffrn_measurement_method        'Phi and Omega Scans'
_diffrn_detector_area_resol_mean  ?
_diffrn_standards_number          ?
_diffrn_standards_interval_count  ?
_diffrn_standards_interval_time   ?
_diffrn_standards_decay_%         ?
_diffrn_reflns_number             57546
_diffrn_reflns_av_R_equivalents   0.0212
_diffrn_reflns_av_sigmaI/netI     0.0178
_diffrn_reflns_limit_h_min        -17
_diffrn_reflns_limit_h_max        17
_diffrn_reflns_limit_k_min        -30
_diffrn_reflns_limit_k_max        23
_diffrn_reflns_limit_l_min        -22
_diffrn_reflns_limit_l_max        22
_diffrn_reflns_theta_min          1.58
_diffrn_reflns_theta_max          25.00
_reflns_number_total              12889
_reflns_number_gt                 11448
_reflns_threshold_expression      >2sigma(I)
 
_computing_data_collection       'APEX2 (Bruker, 2004)'
_computing_cell_refinement       'APEX2/SAINT (Bruker, 2004)'
_computing_data_reduction        'SAINT/XPREP (Bruker, 2004; Sheldrick, 2003)'
_computing_structure_solution    'SHELXS-97 (Sheldrick, 1990)'
_computing_structure_refinement  'SHELXL-97 (Sheldrick, 1997)'
_computing_molecular_graphics    'XP (Sheldrick, 1998)'
_computing_publication_material  'XCIF (Sheldrick, 2001)'
  
_refine_special_details
;
 Refinement of F^2^ against ALL reflections.  The weighted R-factor wR and
 goodness of fit S are based on F^2^, conventional R-factors R are based
 on F, with F set to zero for negative F^2^. The threshold expression of
 F^2^ > 2sigma(F^2^) is used only for calculating R-factors(gt) etc. and is
 not relevant to the choice of reflections for refinement.  R-factors based
 on F^2^ are statistically about twice as large as those based on F, and R-
 factors based on ALL data will be even larger.
;
 
_refine_ls_structure_factor_coef  Fsqd
_refine_ls_matrix_type            full
_refine_ls_weighting_scheme       calc
_refine_ls_weighting_details
 'calc w=1/[\s^2^(Fo^2^)+(0.0232P)^2^+14.1596P] where P=(Fo^2^+2Fc^2^)/3'
_atom_sites_solution_primary      direct
_atom_sites_solution_secondary    difmap
_atom_sites_solution_hydrogens    geom
_refine_ls_hydrogen_treatment     constr
_refine_ls_extinction_method      none
_refine_ls_extinction_coef        ?
_refine_ls_number_reflns          12889
_refine_ls_number_parameters      755
_refine_ls_number_restraints      2
_refine_ls_R_factor_all           0.0315
_refine_ls_R_factor_gt            0.0260
_refine_ls_wR_factor_ref          0.0658
_refine_ls_wR_factor_gt           0.0627
_refine_ls_goodness_of_fit_ref    1.079
_refine_ls_restrained_S_all       1.079
_refine_ls_shift/su_max           0.001
_refine_ls_shift/su_mean          0.000
 
loop_
 _atom_site_label
 _atom_site_type_symbol
 _atom_site_fract_x
 _atom_site_fract_y
 _atom_site_fract_z
 _atom_site_U_iso_or_equiv
 _atom_site_adp_type
 _atom_site_occupancy
 _atom_site_symmetry_multiplicity
 _atom_site_calc_flag
 _atom_site_refinement_flags
 _atom_site_disorder_assembly
 _atom_site_disorder_group
Ge1 Ge 0.356276(19) 0.198288(11) 0.098499(15) 0.01774(7) Uani 1 1 d . . .
Ge2 Ge 0.395904(19) 0.304970(11) -0.041740(15) 0.01707(7) Uani 1 1 d . . .
Ge3 Ge 0.481617(19) 0.258093(11) 0.068301(16) 0.01969(7) Uani 1 1 d . . .
Ge4 Ge 0.212416(19) 0.305258(11) 0.000614(15) 0.01771(7) Uani 1 1 d . . .
Ge5 Ge 0.35256(2) 0.318971(11) 0.085823(15) 0.01781(7) Uani 1 1 d . . .
Ge6 Ge 0.399123(19) 0.199863(11) -0.031341(15) 0.01743(7) Uani 1 1 d . . .
Ge7 Ge 0.23214(2) 0.259684(12) 0.127250(16) 0.02083(7) Uani 1 1 d . . .
Ge8 Ge 0.216154(19) 0.201055(12) 0.010480(16) 0.01903(7) Uani 1 1 d . . .
Ge9 Ge 0.26852(2) 0.248342(12) -0.099393(15) 0.02035(7) Uani 1 1 d . . .
C100 C 0.3688(2) 0.12741(11) 0.14224(16) 0.0251(7) Uani 1 1 d . . .
H10A H 0.3785 0.1013 0.1054 0.030 Uiso 1 1 calc R . .
H10B H 0.4217 0.1269 0.1764 0.030 Uiso 1 1 calc R . .
C101 C 0.2868(2) 0.11352(13) 0.17866(17) 0.0293(7) Uani 1 1 d . . .
H101 H 0.2294 0.1164 0.1487 0.035 Uiso 1 1 calc R . .
C102 C 0.2876(2) 0.07100(13) 0.23293(16) 0.0322(7) Uani 1 1 d . . .
H10C H 0.2337 0.0486 0.2340 0.039 Uiso 1 1 calc R . .
H10D H 0.3453 0.0533 0.2455 0.039 Uiso 1 1 calc R . .
C103 C 0.2789(3) 0.12669(13) 0.25330(19) 0.0406(9) Uani 1 1 d . . .
H10E H 0.2198 0.1387 0.2674 0.049 Uiso 1 1 calc R . .
H10F H 0.3312 0.1433 0.2789 0.049 Uiso 1 1 calc R . .
C104 C 0.3704(2) 0.39296(11) 0.11658(15) 0.0205(6) Uani 1 1 d . . .
H10G H 0.4135 0.4101 0.0868 0.025 Uiso 1 1 calc R . .
H10H H 0.3127 0.4118 0.1106 0.025 Uiso 1 1 calc R . .
C105 C 0.4055(2) 0.39563(11) 0.19213(15) 0.0216(6) Uani 1 1 d . . .
H105 H 0.4652 0.3788 0.2030 0.026 Uiso 1 1 calc R . .
C106 C 0.3412(2) 0.39112(13) 0.24813(17) 0.0324(8) Uani 1 1 d . . .
H10I H 0.3606 0.3713 0.2910 0.039 Uiso 1 1 calc R . .
H10J H 0.2766 0.3881 0.2334 0.039 Uiso 1 1 calc R . .
C107 C 0.3867(2) 0.44248(13) 0.23614(16) 0.0287(7) Uani 1 1 d . . .
H10K H 0.3500 0.4708 0.2138 0.034 Uiso 1 1 calc R . .
H10L H 0.4341 0.4540 0.2715 0.034 Uiso 1 1 calc R . .
K10 K 0.82240(4) 0.06362(2) 0.10619(3) 0.01571(12) Uani 1 1 d . . .
K11 K 0.84199(4) 0.43913(2) 0.11400(3) 0.01665(12) Uani 1 1 d . . .
C1 C 0.6174(2) 0.04796(14) -0.01852(17) 0.0315(8) Uani 1 1 d . . .
H1A H 0.5669 0.0282 -0.0419 0.038 Uiso 1 1 calc R . .
H1B H 0.6390 0.0728 -0.0532 0.038 Uiso 1 1 calc R . .
C2 C 0.5833(2) 0.07795(13) 0.04122(17) 0.0309(7) Uani 1 1 d . . .
H2A H 0.5333 0.1008 0.0239 0.037 Uiso 1 1 calc R . .
H2B H 0.5606 0.0537 0.0762 0.037 Uiso 1 1 calc R . .
C3 C 0.6225(2) 0.14284(12) 0.12410(18) 0.0291(7) Uani 1 1 d . . .
H3A H 0.6008 0.1225 0.1636 0.035 Uiso 1 1 calc R . .
H3B H 0.5717 0.1634 0.1029 0.035 Uiso 1 1 calc R . .
C4 C 0.6962(2) 0.17855(12) 0.15064(17) 0.0284(7) Uani 1 1 d . . .
H4A H 0.7191 0.1981 0.1109 0.034 Uiso 1 1 calc R . .
H4B H 0.6728 0.2039 0.1839 0.034 Uiso 1 1 calc R . .
C5 C 0.8351(2) 0.18286(11) 0.21647(16) 0.0262(7) Uani 1 1 d . . .
H5A H 0.8079 0.2077 0.2485 0.031 Uiso 1 1 calc R . .
H5B H 0.8631 0.2030 0.1795 0.031 Uiso 1 1 calc R . .
C6 C 0.9051(2) 0.15076(12) 0.25677(15) 0.0246(7) Uani 1 1 d . . .
H6A H 0.9488 0.1744 0.2816 0.030 Uiso 1 1 calc R . .
H6B H 0.8758 0.1303 0.2927 0.030 Uiso 1 1 calc R . .
C7 C 1.01820(19) 0.14392(12) 0.17267(15) 0.0238(6) Uani 1 1 d . . .
H7A H 1.0705 0.1537 0.2046 0.029 Uiso 1 1 calc R . .
H7B H 0.9893 0.1764 0.1549 0.029 Uiso 1 1 calc R . .
C8 C 1.05080(19) 0.11430(12) 0.11184(15) 0.0248(7) Uani 1 1 d . . .
H8A H 1.0990 0.1341 0.0906 0.030 Uiso 1 1 calc R . .
H8B H 1.0756 0.0804 0.1281 0.030 Uiso 1 1 calc R . .
C9 C 1.0082(2) 0.08737(14) -0.00331(17) 0.0316(8) Uani 1 1 d . . .
H9A H 1.0356 0.0526 0.0041 0.038 Uiso 1 1 calc R . .
H9B H 1.0544 0.1111 -0.0201 0.038 Uiso 1 1 calc R . .
C10 C 0.9306(2) 0.08406(14) -0.05668(16) 0.0339(8) Uani 1 1 d . . .
H10M H 0.9001 0.1182 -0.0613 0.041 Uiso 1 1 calc R . .
H10N H 0.9519 0.0745 -0.1030 0.041 Uiso 1 1 calc R . .
C11 C 0.7975(2) 0.03825(14) -0.08573(16) 0.0339(8) Uani 1 1 d . . .
H11A H 0.8210 0.0279 -0.1310 0.041 Uiso 1 1 calc R . .
H11B H 0.7638 0.0712 -0.0930 0.041 Uiso 1 1 calc R . .
C12 C 0.7363(2) -0.00372(14) -0.06072(15) 0.0312(8) Uani 1 1 d . . .
H12A H 0.6907 -0.0122 -0.0991 0.037 Uiso 1 1 calc R . .
H12B H 0.7720 -0.0355 -0.0500 0.037 Uiso 1 1 calc R . .
C13 C 0.6550(2) -0.03490(12) 0.03548(16) 0.0269(7) Uani 1 1 d . . .
H13A H 0.6238 -0.0568 -0.0011 0.032 Uiso 1 1 calc R . .
H13B H 0.6101 -0.0238 0.0682 0.032 Uiso 1 1 calc R . .
C14 C 0.7250(2) -0.06720(12) 0.07523(16) 0.0269(7) Uani 1 1 d . . .
H14A H 0.6979 -0.1000 0.0908 0.032 Uiso 1 1 calc R . .
H14B H 0.7735 -0.0760 0.0445 0.032 Uiso 1 1 calc R . .
C15 C 0.8260(2) -0.06888(11) 0.17501(17) 0.0260(7) Uani 1 1 d . . .
H15A H 0.8778 -0.0761 0.1468 0.031 Uiso 1 1 calc R . .
H15B H 0.7994 -0.1025 0.1879 0.031 Uiso 1 1 calc R . .
C16 C 0.8565(2) -0.03978(12) 0.23955(16) 0.0252(7) Uani 1 1 d . . .
H16A H 0.8041 -0.0298 0.2656 0.030 Uiso 1 1 calc R . .
H16B H 0.8962 -0.0621 0.2704 0.030 Uiso 1 1 calc R . .
C17 C 0.9398(2) 0.03315(12) 0.28094(15) 0.0241(7) Uani 1 1 d . . .
H17A H 0.9741 0.0090 0.3130 0.029 Uiso 1 1 calc R . .
H17B H 0.8906 0.0484 0.3064 0.029 Uiso 1 1 calc R . .
C18 C 1.00060(19) 0.07562(12) 0.25753(15) 0.0236(6) Uani 1 1 d . . .
H18A H 1.0295 0.0929 0.2995 0.028 Uiso 1 1 calc R . .
H18B H 1.0486 0.0598 0.2313 0.028 Uiso 1 1 calc R . .
C19 C 0.6425(2) 0.40750(12) -0.00707(17) 0.0324(8) Uani 1 1 d . . .
H19A H 0.6754 0.3816 -0.0338 0.039 Uiso 1 1 calc R . .
H19B H 0.5857 0.4155 -0.0348 0.039 Uiso 1 1 calc R . .
C20 C 0.6205(2) 0.38377(13) 0.06127(18) 0.0312(7) Uani 1 1 d . . .
H20A H 0.5895 0.4096 0.0895 0.037 Uiso 1 1 calc R . .
H20B H 0.5801 0.3536 0.0526 0.037 Uiso 1 1 calc R . .
C21 C 0.68306(19) 0.33662(11) 0.15805(15) 0.0220(6) Uani 1 1 d . . .
H21A H 0.6466 0.3060 0.1427 0.026 Uiso 1 1 calc R . .
H21B H 0.6484 0.3574 0.1905 0.026 Uiso 1 1 calc R . .
C22 C 0.76902(19) 0.31913(11) 0.19487(15) 0.0211(6) Uani 1 1 d . . .
H22A H 0.7565 0.2968 0.2353 0.025 Uiso 1 1 calc R . .
H22B H 0.8039 0.2985 0.1624 0.025 Uiso 1 1 calc R . .
C23 C 0.8952(2) 0.34778(13) 0.26338(16) 0.0271(7) Uani 1 1 d . . .
H23A H 0.9334 0.3240 0.2377 0.033 Uiso 1 1 calc R . .
H23B H 0.8748 0.3291 0.3048 0.033 Uiso 1 1 calc R . .
C24 C 0.9476(2) 0.39541(13) 0.28657(16) 0.0290(7) Uani 1 1 d . . .
H24A H 0.9077 0.4192 0.3107 0.035 Uiso 1 1 calc R . .
H24B H 0.9968 0.3849 0.3210 0.035 Uiso 1 1 calc R . .
C26 C 1.06026(19) 0.39409(13) 0.20209(16) 0.0266(7) Uani 1 1 d . . .
H26A H 1.0425 0.3570 0.1984 0.032 Uiso 1 1 calc R . .
H26B H 1.1129 0.3965 0.2363 0.032 Uiso 1 1 calc R . .
C27 C 1.0872(2) 0.41221(13) 0.13173(17) 0.0283(7) Uani 1 1 d . . .
H27A H 1.1071 0.4489 0.1349 0.034 Uiso 1 1 calc R . .
H27B H 1.1378 0.3909 0.1170 0.034 Uiso 1 1 calc R . .
C28 C 1.0380(2) 0.42164(13) 0.01324(16) 0.0316(8) Uani 1 1 d . . .
H28A H 1.0926 0.4023 0.0022 0.038 Uiso 1 1 calc R . .
H28B H 1.0517 0.4593 0.0119 0.038 Uiso 1 1 calc R . .
C29 C 0.9637(2) 0.40931(14) -0.03946(17) 0.0353(8) Uani 1 1 d . . .
H29A H 0.9827 0.4164 -0.0872 0.042 Uiso 1 1 calc R . .
H29B H 0.9482 0.3720 -0.0366 0.042 Uiso 1 1 calc R . .
C30 C 0.8167(2) 0.43154(14) -0.07883(16) 0.0375(8) Uani 1 1 d . . .
H30A H 0.7978 0.3947 -0.0777 0.045 Uiso 1 1 calc R . .
H30B H 0.8380 0.4389 -0.1258 0.045 Uiso 1 1 calc R . .
C31 C 0.7381(2) 0.46629(13) -0.06572(16) 0.0333(8) Uani 1 1 d . . .
H31A H 0.7586 0.5029 -0.0649 0.040 Uiso 1 1 calc R . .
H31B H 0.6922 0.4625 -0.1053 0.040 Uiso 1 1 calc R . .
C32 C 0.6400(2) 0.49882(12) 0.01966(17) 0.0278(7) Uani 1 1 d . . .
H32A H 0.6018 0.4871 0.0570 0.033 Uiso 1 1 calc R . .
H32B H 0.5997 0.5085 -0.0216 0.033 Uiso 1 1 calc R . .
C33 C 0.6906(2) 0.54637(12) 0.04502(16) 0.0269(7) Uani 1 1 d . . .
H33A H 0.7310 0.5580 0.0091 0.032 Uiso 1 1 calc R . .
H33B H 0.6481 0.5749 0.0531 0.032 Uiso 1 1 calc R . .
C34 C 0.7926(2) 0.57875(11) 0.13294(15) 0.0231(6) Uani 1 1 d . . .
H34A H 0.7524 0.6091 0.1363 0.028 Uiso 1 1 calc R . .
H34B H 0.8381 0.5873 0.0993 0.028 Uiso 1 1 calc R . .
C35 C 0.8380(2) 0.56703(11) 0.20349(15) 0.0247(7) Uani 1 1 d . . .
H35A H 0.8704 0.5983 0.2220 0.030 Uiso 1 1 calc R . .
H35B H 0.7926 0.5575 0.2367 0.030 Uiso 1 1 calc R . .
C36 C 0.9457(2) 0.51428(13) 0.26349(16) 0.0288(7) Uani 1 1 d . . .
H36A H 0.9031 0.5004 0.2964 0.035 Uiso 1 1 calc R . .
H36B H 0.9724 0.5466 0.2838 0.035 Uiso 1 1 calc R . .
C37 C 1.0185(2) 0.47492(13) 0.25346(17) 0.0289(7) Uani 1 1 d . . .
H37A H 1.0590 0.4889 0.2192 0.035 Uiso 1 1 calc R . .
H37B H 1.0542 0.4704 0.2987 0.035 Uiso 1 1 calc R . .
N1 N 0.69043(16) 0.01141(10) 0.00191(12) 0.0241(6) Uani 1 1 d . . .
N2 N 0.95389(15) 0.11492(9) 0.21309(12) 0.0191(5) Uani 1 1 d . . .
N3 N 0.69643(17) 0.45513(9) 0.00018(13) 0.0238(5) Uani 1 1 d . . .
N4 N 0.98623(15) 0.42378(10) 0.22897(12) 0.0212(5) Uani 1 1 d . . .
O1 O 0.65469(13) 0.10851(8) 0.07313(11) 0.0276(5) Uani 1 1 d . . .
O2 O 0.76713(13) 0.14924(7) 0.18506(11) 0.0228(4) Uani 1 1 d . . .
O3 O 0.97762(13) 0.10627(8) 0.06085(10) 0.0229(4) Uani 1 1 d . . .
O4 O 0.86955(14) 0.04544(9) -0.03440(10) 0.0278(5) Uani 1 1 d . . .
O5 O 0.76083(13) -0.03867(7) 0.13472(10) 0.0214(4) Uani 1 1 d . . .
O6 O 0.90400(13) 0.00584(8) 0.22058(10) 0.0226(4) Uani 1 1 d . . .
O7 O 0.70185(13) 0.36732(8) 0.09856(10) 0.0227(4) Uani 1 1 d . . .
O8 O 0.81943(13) 0.36364(7) 0.21875(10) 0.0197(4) Uani 1 1 d . . .
O9 O 1.01291(13) 0.40758(8) 0.08159(10) 0.0240(5) Uani 1 1 d . . .
O10 O 0.88672(15) 0.44045(8) -0.02665(10) 0.0274(5) Uani 1 1 d . . .
O11 O 0.74192(13) 0.53444(7) 0.10880(10) 0.0219(4) Uani 1 1 d . . .
O12 O 0.89957(13) 0.52518(8) 0.19751(10) 0.0236(4) Uani 1 1 d . . .
C40 C 0.8625(2) 0.24249(13) -0.00118(19) 0.0331(8) Uani 1 1 d . . .
C41 C 0.9609(2) 0.24880(13) 0.02275(17) 0.0294(7) Uani 1 1 d . . .
C42 C 0.6763(3) 0.20212(15) 0.8471(2) 0.0457(9) Uani 1 1 d . . .
C43 C 0.6175(3) 0.24935(15) 0.8346(2) 0.0432(9) Uani 1 1 d . A .
N5 N 0.81904(19) 0.29382(11) -0.01401(16) 0.0386(7) Uani 1 1 d . . .
N6 N 0.97144(18) 0.27705(11) 0.09043(14) 0.0309(6) Uani 1 1 d . . .
N7 N 0.62583(19) 0.28504(13) 0.89503(17) 0.0456(8) Uani 1 1 d . . .
N8 N 0.6490(3) 0.17061(16) 0.9074(2) 0.0555(13) Uani 0.862(8) 1 d P A 4
N18 N 0.7771(14) 0.2256(9) 0.8338(11) 0.038(7) Uiso 0.138(8) 1 d P A 5
C45 C -0.0188(5) 0.2733(3) 0.8124(4) 0.0282(16) Uiso 0.516(7) 1 d P B 2
C44 C 0.0385(4) 0.2258(3) 0.7799(3) 0.0243(15) Uiso 0.516(7) 1 d P B 2
N9 N -0.1036(5) 0.2542(3) 0.8181(4) 0.053(2) Uiso 0.516(7) 1 d P B 2
N10 N 0.0250(6) 0.1881(3) 0.8435(5) 0.067(3) Uiso 0.516(7) 1 d P B 2
N19 N 0.0396(5) 0.3125(3) 0.8309(4) 0.060(2) Uiso 0.484(7) 1 d P B 3
C144 C -0.0193(11) 0.2227(5) 0.8151(8) 0.114(5) Uiso 0.484(7) 1 d PD B 3
C145 C 0.0068(9) 0.2785(4) 0.7844(7) 0.077(3) Uiso 0.484(7) 1 d PD B 3
N20 N 0.0517(5) 0.1799(3) 0.8227(5) 0.0000(17) Uiso 0.242(3) 1 d P B 3
N21 N 0.0514(9) 0.1973(6) 0.7877(8) 0.041(3) Uiso 0.242(3) 1 d P B 3
 
loop_
 _atom_site_aniso_label
 _atom_site_aniso_U_11
 _atom_site_aniso_U_22
 _atom_site_aniso_U_33
 _atom_site_aniso_U_23
 _atom_site_aniso_U_13
 _atom_site_aniso_U_12
Ge1 0.01901(15) 0.01419(15) 0.02015(15) 0.00388(11) 0.00226(12) 0.00062(12)
Ge2 0.01762(15) 0.01425(15) 0.01970(15) 0.00288(11) 0.00401(12) -0.00044(11)
Ge3 0.01559(15) 0.01476(15) 0.02797(17) 0.00182(12) -0.00403(12) -0.00081(12)
Ge4 0.01609(15) 0.01723(15) 0.01985(15) 0.00080(12) 0.00143(11) 0.00338(12)
Ge5 0.02146(15) 0.01337(15) 0.01842(15) -0.00199(11) -0.00012(12) 0.00022(12)
Ge6 0.01821(15) 0.01386(15) 0.02064(15) -0.00181(11) 0.00436(12) 0.00081(12)
Ge7 0.02349(16) 0.02100(16) 0.01886(15) 0.00146(12) 0.00777(12) 0.00193(13)
Ge8 0.01552(15) 0.01757(15) 0.02411(16) -0.00035(12) 0.00210(12) -0.00360(12)
Ge9 0.02275(16) 0.02337(16) 0.01465(15) -0.00195(12) -0.00081(12) 0.00023(13)
C100 0.0312(17) 0.0190(15) 0.0255(16) 0.0061(12) 0.0059(13) 0.0029(13)
C101 0.0245(16) 0.0324(18) 0.0307(17) 0.0124(14) -0.0010(13) -0.0036(14)
C102 0.042(2) 0.0268(17) 0.0281(17) 0.0080(14) 0.0053(15) -0.0018(15)
C103 0.053(2) 0.0299(19) 0.041(2) 0.0048(16) 0.0204(18) 0.0071(17)
C104 0.0245(15) 0.0147(14) 0.0220(15) -0.0021(11) 0.0000(12) 0.0010(12)
C105 0.0227(15) 0.0195(15) 0.0224(15) -0.0029(12) -0.0014(12) -0.0002(12)
C106 0.0341(18) 0.040(2) 0.0232(16) -0.0033(14) 0.0031(14) -0.0078(15)
C107 0.0323(17) 0.0281(17) 0.0255(16) -0.0081(13) 0.0012(13) -0.0028(14)
K10 0.0148(3) 0.0158(3) 0.0166(3) 0.0005(2) 0.0017(2) -0.0009(2)
K11 0.0185(3) 0.0160(3) 0.0156(3) -0.0005(2) 0.0015(2) 0.0006(2)
C1 0.0229(16) 0.043(2) 0.0271(17) 0.0092(15) -0.0094(13) -0.0117(14)
C2 0.0182(15) 0.0357(19) 0.0376(19) 0.0081(15) -0.0064(13) -0.0021(14)
C3 0.0210(15) 0.0259(17) 0.0407(19) 0.0103(14) 0.0048(14) 0.0103(13)
C4 0.0285(17) 0.0178(15) 0.0397(19) 0.0055(13) 0.0088(14) 0.0093(13)
C5 0.0357(18) 0.0162(15) 0.0270(16) -0.0062(12) 0.0048(13) -0.0014(13)
C6 0.0327(17) 0.0254(16) 0.0157(14) -0.0045(12) 0.0019(12) -0.0061(13)
C7 0.0209(15) 0.0267(16) 0.0234(15) 0.0026(12) -0.0017(12) -0.0121(13)
C8 0.0173(14) 0.0323(17) 0.0247(16) 0.0068(13) 0.0011(12) -0.0060(13)
C9 0.0276(17) 0.0392(19) 0.0300(17) -0.0077(15) 0.0160(14) -0.0145(15)
C10 0.0377(19) 0.042(2) 0.0230(16) -0.0027(14) 0.0119(14) -0.0226(16)
C11 0.0365(19) 0.047(2) 0.0183(16) -0.0026(14) 0.0046(14) -0.0197(16)
C12 0.0365(18) 0.042(2) 0.0154(15) -0.0057(13) 0.0033(13) -0.0200(16)
C13 0.0285(16) 0.0296(17) 0.0229(16) -0.0054(13) 0.0043(13) -0.0166(14)
C14 0.0350(18) 0.0190(15) 0.0278(16) -0.0066(13) 0.0101(14) -0.0099(13)
C15 0.0255(16) 0.0160(15) 0.0373(18) 0.0081(13) 0.0088(13) 0.0033(12)
C16 0.0239(15) 0.0211(16) 0.0305(17) 0.0110(13) 0.0021(13) -0.0026(13)
C17 0.0222(15) 0.0281(17) 0.0216(15) 0.0086(13) -0.0021(12) -0.0018(13)
C18 0.0194(15) 0.0298(17) 0.0211(15) 0.0050(13) -0.0021(12) -0.0037(13)
C19 0.0362(18) 0.0249(17) 0.0330(18) 0.0008(14) -0.0208(15) -0.0034(14)
C20 0.0246(16) 0.0223(16) 0.045(2) 0.0069(14) -0.0134(14) -0.0060(13)
C21 0.0241(15) 0.0142(14) 0.0277(16) -0.0003(12) 0.0016(12) -0.0062(12)
C22 0.0266(16) 0.0127(14) 0.0243(15) 0.0023(12) 0.0037(12) -0.0016(12)
C23 0.0244(16) 0.0332(18) 0.0232(16) 0.0135(13) -0.0019(12) -0.0003(14)
C24 0.0264(16) 0.041(2) 0.0185(15) 0.0035(14) -0.0043(13) -0.0042(14)
C26 0.0175(15) 0.0294(17) 0.0321(17) -0.0014(14) -0.0033(12) 0.0039(13)
C27 0.0183(15) 0.0299(17) 0.0373(18) -0.0048(14) 0.0070(13) 0.0017(13)
C28 0.0339(18) 0.0328(18) 0.0305(18) 0.0091(14) 0.0214(14) 0.0123(15)
C29 0.049(2) 0.0330(19) 0.0254(17) 0.0017(14) 0.0163(15) 0.0187(16)
C30 0.055(2) 0.041(2) 0.0165(16) 0.0010(14) 0.0019(15) 0.0099(17)
C31 0.046(2) 0.0336(19) 0.0187(16) 0.0068(13) -0.0062(14) 0.0062(16)
C32 0.0276(17) 0.0254(16) 0.0295(17) 0.0067(13) -0.0055(13) 0.0063(13)
C33 0.0348(17) 0.0194(15) 0.0262(16) 0.0055(13) 0.0000(13) 0.0063(13)
C34 0.0311(16) 0.0151(14) 0.0242(15) -0.0011(12) 0.0098(13) -0.0011(12)
C35 0.0330(17) 0.0173(15) 0.0247(16) -0.0057(12) 0.0103(13) 0.0010(13)
C36 0.0306(17) 0.0307(18) 0.0244(16) -0.0105(13) -0.0024(13) -0.0025(14)
C37 0.0244(16) 0.0315(18) 0.0299(17) -0.0093(14) -0.0043(13) -0.0034(14)
N1 0.0243(13) 0.0304(14) 0.0175(12) -0.0003(10) 0.0009(10) -0.0105(11)
N2 0.0207(12) 0.0188(12) 0.0177(12) 0.0023(10) 0.0004(10) -0.0033(10)
N3 0.0294(14) 0.0189(13) 0.0221(13) 0.0033(10) -0.0059(11) 0.0010(11)
N4 0.0163(12) 0.0253(13) 0.0220(13) -0.0017(10) 0.0003(10) -0.0016(10)
O1 0.0164(10) 0.0306(12) 0.0354(12) -0.0001(10) -0.0006(9) 0.0016(9)
O2 0.0245(11) 0.0137(10) 0.0303(11) 0.0000(8) 0.0017(9) 0.0022(8)
O3 0.0189(10) 0.0294(12) 0.0208(10) -0.0028(9) 0.0048(8) -0.0077(9)
O4 0.0279(11) 0.0357(13) 0.0206(11) -0.0023(9) 0.0059(9) -0.0152(10)
O5 0.0259(11) 0.0139(10) 0.0244(11) -0.0002(8) 0.0025(8) -0.0009(8)
O6 0.0228(10) 0.0215(11) 0.0232(11) 0.0089(8) 0.0000(8) -0.0040(9)
O7 0.0216(10) 0.0192(10) 0.0264(11) 0.0043(8) -0.0055(8) -0.0035(8)
O8 0.0211(10) 0.0174(10) 0.0202(10) 0.0023(8) -0.0019(8) -0.0005(8)
O9 0.0235(11) 0.0256(11) 0.0240(11) 0.0027(9) 0.0093(9) 0.0041(9)
O10 0.0364(12) 0.0283(12) 0.0181(10) -0.0011(9) 0.0052(9) 0.0091(10)
O11 0.0279(11) 0.0151(10) 0.0227(11) 0.0037(8) 0.0022(9) 0.0006(8)
O12 0.0282(11) 0.0227(11) 0.0201(10) -0.0062(8) 0.0039(9) 0.0001(9)
C40 0.0298(18) 0.0302(18) 0.039(2) 0.0010(15) -0.0011(15) 0.0009(14)
C41 0.0269(17) 0.0330(18) 0.0286(17) 0.0016(14) 0.0028(13) 0.0040(14)
C42 0.064(3) 0.033(2) 0.040(2) -0.0034(16) 0.0044(19) 0.0033(18)
C43 0.041(2) 0.047(2) 0.040(2) -0.0109(17) -0.0063(17) 0.0040(17)
N5 0.0323(16) 0.0310(16) 0.0515(19) -0.0037(14) -0.0051(14) 0.0069(13)
N6 0.0305(15) 0.0366(16) 0.0257(14) 0.0001(12) 0.0021(11) -0.0005(12)
N7 0.0295(16) 0.053(2) 0.053(2) -0.0241(16) -0.0033(14) 0.0020(15)
N8 0.063(3) 0.042(2) 0.061(3) 0.020(2) 0.001(2) -0.001(2)
 
_geom_special_details
;
 All esds (except the esd in the dihedral angle between two l.s. planes)
 are estimated using the full covariance matrix.  The cell esds are taken
 into account individually in the estimation of esds in distances, angles
 and torsion angles; correlations between esds in cell parameters are only
 used when they are defined by crystal symmetry.  An approximate (isotropic)
 treatment of cell esds is used for estimating esds involving l.s. planes.
;
 
loop_
 _geom_bond_atom_site_label_1
 _geom_bond_atom_site_label_2
 _geom_bond_distance
 _geom_bond_site_symmetry_2
 _geom_bond_publ_flag
Ge1 C100 2.008(3) . ?
Ge1 Ge3 2.5199(4) . ?
Ge1 Ge7 2.5240(4) . ?
Ge1 Ge8 2.5948(4) . ?
Ge1 Ge6 2.6021(4) . ?
Ge2 Ge9 2.5824(4) . ?
Ge2 Ge5 2.5872(4) . ?
Ge2 Ge3 2.6722(4) . ?
Ge2 Ge6 2.7100(4) . ?
Ge2 Ge4 2.9101(4) . ?
Ge3 Ge5 2.5233(4) . ?
Ge3 Ge6 2.6572(4) . ?
Ge4 Ge5 2.5868(4) . ?
Ge4 Ge9 2.5897(4) . ?
Ge4 Ge7 2.6848(4) . ?
Ge4 Ge8 2.6863(4) . ?
Ge5 C104 2.004(3) . ?
Ge5 Ge7 2.5255(4) . ?
Ge6 Ge9 2.5893(4) . ?
Ge6 Ge8 2.8993(4) . ?
Ge7 Ge8 2.6883(4) . ?
Ge8 Ge9 2.5909(4) . ?
C100 C101 1.493(4) . ?
C100 H10A 0.9900 . ?
C100 H10B 0.9900 . ?
C101 C103 1.477(5) . ?
C101 C102 1.506(4) . ?
C101 H101 1.0000 . ?
C102 C103 1.492(5) . ?
C102 H10C 0.9900 . ?
C102 H10D 0.9900 . ?
C103 H10E 0.9900 . ?
C103 H10F 0.9900 . ?
C104 C105 1.502(4) . ?
C104 H10G 0.9900 . ?
C104 H10H 0.9900 . ?
C105 C106 1.489(4) . ?
C105 C107 1.506(4) . ?
C105 H105 1.0000 . ?
C106 C107 1.510(5) . ?
C106 H10I 0.9900 . ?
C106 H10J 0.9900 . ?
C107 H10K 0.9900 . ?
C107 H10L 0.9900 . ?
K10 O3 2.7571(19) . ?
K10 O1 2.792(2) . ?
K10 O2 2.822(2) . ?
K10 O6 2.846(2) . ?
K10 O5 2.851(2) . ?
K10 O4 2.859(2) . ?
K10 N1 3.020(2) . ?
K10 N2 3.036(2) . ?
K11 O9 2.788(2) . ?
K11 O7 2.792(2) . ?
K11 O10 2.811(2) . ?
K11 O8 2.8236(19) . ?
K11 O12 2.827(2) . ?
K11 O11 2.869(2) . ?
K11 N4 2.996(2) . ?
K11 N3 2.996(2) . ?
C1 N1 1.473(4) . ?
C1 C2 1.494(5) . ?
C1 H1A 0.9900 . ?
C1 H1B 0.9900 . ?
C2 O1 1.427(4) . ?
C2 H2A 0.9900 . ?
C2 H2B 0.9900 . ?
C3 O1 1.421(4) . ?
C3 C4 1.495(5) . ?
C3 H3A 0.9900 . ?
C3 H3B 0.9900 . ?
C4 O2 1.424(4) . ?
C4 H4A 0.9900 . ?
C4 H4B 0.9900 . ?
C5 O2 1.433(4) . ?
C5 C6 1.503(4) . ?
C5 H5A 0.9900 . ?
C5 H5B 0.9900 . ?
C6 N2 1.469(4) . ?
C6 H6A 0.9900 . ?
C6 H6B 0.9900 . ?
C7 N2 1.475(4) . ?
C7 C8 1.498(4) . ?
C7 H7A 0.9900 . ?
C7 H7B 0.9900 . ?
C8 O3 1.429(3) . ?
C8 H8A 0.9900 . ?
C8 H8B 0.9900 . ?
C9 O3 1.422(4) . ?
C9 C10 1.494(5) . ?
C9 H9A 0.9900 . ?
C9 H9B 0.9900 . ?
C10 O4 1.432(4) . ?
C10 H10M 0.9900 . ?
C10 H10N 0.9900 . ?
C11 O4 1.418(4) . ?
C11 C12 1.513(4) . ?
C11 H11A 0.9900 . ?
C11 H11B 0.9900 . ?
C12 N1 1.470(4) . ?
C12 H12A 0.9900 . ?
C12 H12B 0.9900 . ?
C13 N1 1.468(4) . ?
C13 C14 1.500(5) . ?
C13 H13A 0.9900 . ?
C13 H13B 0.9900 . ?
C14 O5 1.426(3) . ?
C14 H14A 0.9900 . ?
C14 H14B 0.9900 . ?
C15 O5 1.429(3) . ?
C15 C16 1.486(4) . ?
C15 H15A 0.9900 . ?
C15 H15B 0.9900 . ?
C16 O6 1.430(3) . ?
C16 H16A 0.9900 . ?
C16 H16B 0.9900 . ?
C17 O6 1.423(4) . ?
C17 C18 1.507(4) . ?
C17 H17A 0.9900 . ?
C17 H17B 0.9900 . ?
C18 N2 1.466(4) . ?
C18 H18A 0.9900 . ?
C18 H18B 0.9900 . ?
C19 N3 1.468(4) . ?
C19 C20 1.497(5) . ?
C19 H19A 0.9900 . ?
C19 H19B 0.9900 . ?
C20 O7 1.430(3) . ?
C20 H20A 0.9900 . ?
C20 H20B 0.9900 . ?
C21 O7 1.426(3) . ?
C21 C22 1.491(4) . ?
C21 H21A 0.9900 . ?
C21 H21B 0.9900 . ?
C22 O8 1.428(3) . ?
C22 H22A 0.9900 . ?
C22 H22B 0.9900 . ?
C23 O8 1.429(3) . ?
C23 C24 1.505(4) . ?
C23 H23A 0.9900 . ?
C23 H23B 0.9900 . ?
C24 N4 1.470(4) . ?
C24 H24A 0.9900 . ?
C24 H24B 0.9900 . ?
C26 N4 1.465(4) . ?
C26 C27 1.502(4) . ?
C26 H26A 0.9900 . ?
C26 H26B 0.9900 . ?
C27 O9 1.420(4) . ?
C27 H27A 0.9900 . ?
C27 H27B 0.9900 . ?
C28 O9 1.429(3) . ?
C28 C29 1.481(5) . ?
C28 H28A 0.9900 . ?
C28 H28B 0.9900 . ?
C29 O10 1.436(4) . ?
C29 H29A 0.9900 . ?
C29 H29B 0.9900 . ?
C30 O10 1.414(4) . ?
C30 C31 1.509(5) . ?
C30 H30A 0.9900 . ?
C30 H30B 0.9900 . ?
C31 N3 1.469(4) . ?
C31 H31A 0.9900 . ?
C31 H31B 0.9900 . ?
C32 N3 1.468(4) . ?
C32 C33 1.501(4) . ?
C32 H32A 0.9900 . ?
C32 H32B 0.9900 . ?
C33 O11 1.427(4) . ?
C33 H33A 0.9900 . ?
C33 H33B 0.9900 . ?
C34 O11 1.427(3) . ?
C34 C35 1.497(4) . ?
C34 H34A 0.9900 . ?
C34 H34B 0.9900 . ?
C35 O12 1.426(3) . ?
C35 H35A 0.9900 . ?
C35 H35B 0.9900 . ?
C36 O12 1.422(4) . ?
C36 C37 1.508(4) . ?
C36 H36A 0.9900 . ?
C36 H36B 0.9900 . ?
C37 N4 1.466(4) . ?
C37 H37A 0.9900 . ?
C37 H37B 0.9900 . ?
C40 N5 1.484(4) . ?
C40 C41 1.518(5) . ?
C41 N6 1.481(4) . ?
C42 N8 1.487(5) . ?
C42 C43 1.508(5) . ?
C42 N18 1.66(2) . ?
C43 N7 1.473(5) . ?
C45 N9 1.369(10) . ?
C45 C44 1.638(9) . ?
C44 N10 1.577(11) . ?
N19 C145 1.315(14) . ?
C144 N21 1.38(2) . ?
C144 C145 1.606(9) . ?
C144 N20 1.529(18) . ?
N20 N21 0.804(14) . ?
 
loop_
 _geom_angle_atom_site_label_1
 _geom_angle_atom_site_label_2
 _geom_angle_atom_site_label_3
 _geom_angle
 _geom_angle_site_symmetry_1
 _geom_angle_site_symmetry_3
 _geom_angle_publ_flag
C100 Ge1 Ge3 126.82(9) . . ?
C100 Ge1 Ge7 121.76(9) . . ?
Ge3 Ge1 Ge7 103.674(14) . . ?
C100 Ge1 Ge8 110.03(9) . . ?
Ge3 Ge1 Ge8 114.485(14) . . ?
Ge7 Ge1 Ge8 63.342(12) . . ?
C100 Ge1 Ge6 112.85(9) . . ?
Ge3 Ge1 Ge6 62.479(12) . . ?
Ge7 Ge1 Ge6 115.421(14) . . ?
Ge8 Ge1 Ge6 67.820(12) . . ?
Ge9 Ge2 Ge5 104.795(14) . . ?
Ge9 Ge2 Ge3 112.377(14) . . ?
Ge5 Ge2 Ge3 57.314(11) . . ?
Ge9 Ge2 Ge6 58.522(11) . . ?
Ge5 Ge2 Ge6 94.252(12) . . ?
Ge3 Ge2 Ge6 59.164(11) . . ?
Ge9 Ge2 Ge4 55.880(11) . . ?
Ge5 Ge2 Ge4 55.768(10) . . ?
Ge3 Ge2 Ge4 101.121(12) . . ?
Ge6 Ge2 Ge4 89.688(11) . . ?
Ge1 Ge3 Ge5 76.225(13) . . ?
Ge1 Ge3 Ge6 60.276(11) . . ?
Ge5 Ge3 Ge6 97.065(13) . . ?
Ge1 Ge3 Ge2 97.541(13) . . ?
Ge5 Ge3 Ge2 59.649(11) . . ?
Ge6 Ge3 Ge2 61.128(11) . . ?
Ge5 Ge4 Ge9 104.597(14) . . ?
Ge5 Ge4 Ge7 57.215(11) . . ?
Ge9 Ge4 Ge7 113.325(14) . . ?
Ge5 Ge4 Ge8 94.575(13) . . ?
Ge9 Ge4 Ge8 58.789(11) . . ?
Ge7 Ge4 Ge8 60.067(11) . . ?
Ge5 Ge4 Ge2 55.782(10) . . ?
Ge9 Ge4 Ge2 55.642(10) . . ?
Ge7 Ge4 Ge2 101.605(12) . . ?
Ge8 Ge4 Ge2 90.083(11) . . ?
C104 Ge5 Ge3 122.68(9) . . ?
C104 Ge5 Ge7 124.41(9) . . ?
Ge3 Ge5 Ge7 103.530(14) . . ?
C104 Ge5 Ge4 113.57(8) . . ?
Ge3 Ge5 Ge4 115.162(14) . . ?
Ge7 Ge5 Ge4 63.345(12) . . ?
C104 Ge5 Ge2 111.78(8) . . ?
Ge3 Ge5 Ge2 63.037(12) . . ?
Ge7 Ge5 Ge2 116.095(14) . . ?
Ge4 Ge5 Ge2 68.450(12) . . ?
Ge9 Ge6 Ge1 105.057(13) . . ?
Ge9 Ge6 Ge3 112.644(14) . . ?
Ge1 Ge6 Ge3 57.245(11) . . ?
Ge9 Ge6 Ge2 58.273(11) . . ?
Ge1 Ge6 Ge2 94.647(12) . . ?
Ge3 Ge6 Ge2 59.708(11) . . ?
Ge9 Ge6 Ge8 55.992(11) . . ?
Ge1 Ge6 Ge8 55.972(10) . . ?
Ge3 Ge6 Ge8 101.364(13) . . ?
Ge2 Ge6 Ge8 89.843(12) . . ?
Ge1 Ge7 Ge5 76.113(12) . . ?
Ge1 Ge7 Ge4 96.579(13) . . ?
Ge5 Ge7 Ge4 59.440(11) . . ?
Ge1 Ge7 Ge8 59.615(11) . . ?
Ge5 Ge7 Ge8 95.965(13) . . ?
Ge4 Ge7 Ge8 59.994(11) . . ?
Ge9 Ge8 Ge1 105.218(14) . . ?
Ge9 Ge8 Ge4 58.744(11) . . ?
Ge1 Ge8 Ge4 94.863(13) . . ?
Ge9 Ge8 Ge7 113.169(14) . . ?
Ge1 Ge8 Ge7 57.043(11) . . ?
Ge4 Ge8 Ge7 59.938(11) . . ?
Ge9 Ge8 Ge6 55.939(11) . . ?
Ge1 Ge8 Ge6 56.209(10) . . ?
Ge4 Ge8 Ge6 90.386(12) . . ?
Ge7 Ge8 Ge6 101.647(13) . . ?
Ge2 Ge9 Ge6 63.205(11) . . ?
Ge2 Ge9 Ge4 68.479(12) . . ?
Ge6 Ge9 Ge4 99.945(13) . . ?
Ge2 Ge9 Ge8 100.009(13) . . ?
Ge6 Ge9 Ge8 68.069(12) . . ?
Ge4 Ge9 Ge8 62.467(12) . . ?
C101 C100 Ge1 110.8(2) . . ?
C101 C100 H10A 109.5 . . ?
Ge1 C100 H10A 109.5 . . ?
C101 C100 H10B 109.5 . . ?
Ge1 C100 H10B 109.5 . . ?
H10A C100 H10B 108.1 . . ?
C103 C101 C100 121.1(3) . . ?
C103 C101 C102 60.0(2) . . ?
C100 C101 C102 121.7(3) . . ?
C103 C101 H101 114.5 . . ?
C100 C101 H101 114.5 . . ?
C102 C101 H101 114.5 . . ?
C103 C102 C101 59.0(2) . . ?
C103 C102 H10C 117.9 . . ?
C101 C102 H10C 117.9 . . ?
C103 C102 H10D 117.9 . . ?
C101 C102 H10D 117.9 . . ?
H10C C102 H10D 115.0 . . ?
C101 C103 C102 61.0(2) . . ?
C101 C103 H10E 117.7 . . ?
C102 C103 H10E 117.7 . . ?
C101 C103 H10F 117.7 . . ?
C102 C103 H10F 117.7 . . ?
H10E C103 H10F 114.8 . . ?
C105 C104 Ge5 110.83(19) . . ?
C105 C104 H10G 109.5 . . ?
Ge5 C104 H10G 109.5 . . ?
C105 C104 H10H 109.5 . . ?
Ge5 C104 H10H 109.5 . . ?
H10G C104 H10H 108.1 . . ?
C106 C105 C104 119.1(3) . . ?
C106 C105 C107 60.5(2) . . ?
C104 C105 C107 120.4(3) . . ?
C106 C105 H105 115.3 . . ?
C104 C105 H105 115.3 . . ?
C107 C105 H105 115.3 . . ?
C105 C106 C107 60.3(2) . . ?
C105 C106 H10I 117.7 . . ?
C107 C106 H10I 117.7 . . ?
C105 C106 H10J 117.7 . . ?
C107 C106 H10J 117.7 . . ?
H10I C106 H10J 114.9 . . ?
C105 C107 C106 59.2(2) . . ?
C105 C107 H10K 117.9 . . ?
C106 C107 H10K 117.9 . . ?
C105 C107 H10L 117.9 . . ?
C106 C107 H10L 117.9 . . ?
H10K C107 H10L 115.0 . . ?
O3 K10 O1 121.71(6) . . ?
O3 K10 O2 98.05(6) . . ?
O1 K10 O2 60.50(6) . . ?
O3 K10 O6 97.06(6) . . ?
O1 K10 O6 136.09(6) . . ?
O2 K10 O6 97.09(6) . . ?
O3 K10 O5 135.73(6) . . ?
O1 K10 O5 97.38(6) . . ?
O2 K10 O5 120.52(6) . . ?
O6 K10 O5 59.92(6) . . ?
O3 K10 O4 60.28(6) . . ?
O1 K10 O4 97.46(6) . . ?
O2 K10 O4 136.72(6) . . ?
O6 K10 O4 120.99(6) . . ?
O5 K10 O4 97.57(6) . . ?
O3 K10 N1 119.68(6) . . ?
O1 K10 N1 59.93(7) . . ?
O2 K10 N1 119.80(7) . . ?
O6 K10 N1 120.01(7) . . ?
O5 K10 N1 60.74(6) . . ?
O4 K10 N1 59.99(6) . . ?
O3 K10 N2 61.23(6) . . ?
O1 K10 N2 120.14(7) . . ?
O2 K10 N2 60.12(6) . . ?
O6 K10 N2 59.15(6) . . ?
O5 K10 N2 118.34(6) . . ?
O4 K10 N2 120.84(6) . . ?
N1 K10 N2 178.99(7) . . ?
O9 K11 O7 118.39(6) . . ?
O9 K11 O10 60.72(6) . . ?
O7 K11 O10 97.60(6) . . ?
O9 K11 O8 96.44(6) . . ?
O7 K11 O8 59.69(6) . . ?
O10 K11 O8 137.09(6) . . ?
O9 K11 O12 96.01(6) . . ?
O7 K11 O12 140.75(6) . . ?
O10 K11 O12 116.51(6) . . ?
O8 K11 O12 100.66(6) . . ?
O9 K11 O11 136.37(6) . . ?
O7 K11 O11 100.14(6) . . ?
O10 K11 O11 96.53(6) . . ?
O8 K11 O11 121.65(6) . . ?
O12 K11 O11 59.26(6) . . ?
O9 K11 N4 60.02(6) . . ?
O7 K11 N4 119.15(6) . . ?
O10 K11 N4 119.72(7) . . ?
O8 K11 N4 60.33(6) . . ?
O12 K11 N4 60.90(6) . . ?
O11 K11 N4 119.02(6) . . ?
O9 K11 N3 120.63(7) . . ?
O7 K11 N3 60.80(6) . . ?
O10 K11 N3 60.89(7) . . ?
O8 K11 N3 119.49(6) . . ?
O12 K11 N3 118.67(7) . . ?
O11 K11 N3 60.45(6) . . ?
N4 K11 N3 179.33(7) . . ?
N1 C1 C2 114.3(2) . . ?
N1 C1 H1A 108.7 . . ?
C2 C1 H1A 108.7 . . ?
N1 C1 H1B 108.7 . . ?
C2 C1 H1B 108.7 . . ?
H1A C1 H1B 107.6 . . ?
O1 C2 C1 109.1(2) . . ?
O1 C2 H2A 109.9 . . ?
C1 C2 H2A 109.9 . . ?
O1 C2 H2B 109.9 . . ?
C1 C2 H2B 109.9 . . ?
H2A C2 H2B 108.3 . . ?
O1 C3 C4 109.8(2) . . ?
O1 C3 H3A 109.7 . . ?
C4 C3 H3A 109.7 . . ?
O1 C3 H3B 109.7 . . ?
C4 C3 H3B 109.7 . . ?
H3A C3 H3B 108.2 . . ?
O2 C4 C3 109.8(2) . . ?
O2 C4 H4A 109.7 . . ?
C3 C4 H4A 109.7 . . ?
O2 C4 H4B 109.7 . . ?
C3 C4 H4B 109.7 . . ?
H4A C4 H4B 108.2 . . ?
O2 C5 C6 109.4(2) . . ?
O2 C5 H5A 109.8 . . ?
C6 C5 H5A 109.8 . . ?
O2 C5 H5B 109.8 . . ?
C6 C5 H5B 109.8 . . ?
H5A C5 H5B 108.2 . . ?
N2 C6 C5 114.1(2) . . ?
N2 C6 H6A 108.7 . . ?
C5 C6 H6A 108.7 . . ?
N2 C6 H6B 108.7 . . ?
C5 C6 H6B 108.7 . . ?
H6A C6 H6B 107.6 . . ?
N2 C7 C8 114.0(2) . . ?
N2 C7 H7A 108.8 . . ?
C8 C7 H7A 108.8 . . ?
N2 C7 H7B 108.8 . . ?
C8 C7 H7B 108.8 . . ?
H7A C7 H7B 107.7 . . ?
O3 C8 C7 109.1(2) . . ?
O3 C8 H8A 109.9 . . ?
C7 C8 H8A 109.9 . . ?
O3 C8 H8B 109.9 . . ?
C7 C8 H8B 109.9 . . ?
H8A C8 H8B 108.3 . . ?
O3 C9 C10 109.1(3) . . ?
O3 C9 H9A 109.9 . . ?
C10 C9 H9A 109.9 . . ?
O3 C9 H9B 109.9 . . ?
C10 C9 H9B 109.9 . . ?
H9A C9 H9B 108.3 . . ?
O4 C10 C9 108.5(3) . . ?
O4 C10 H10M 110.0 . . ?
C9 C10 H10M 110.0 . . ?
O4 C10 H10N 110.0 . . ?
C9 C10 H10N 110.0 . . ?
H10M C10 H10N 108.4 . . ?
O4 C11 C12 108.8(3) . . ?
O4 C11 H11A 109.9 . . ?
C12 C11 H11A 109.9 . . ?
O4 C11 H11B 109.9 . . ?
C12 C11 H11B 109.9 . . ?
H11A C11 H11B 108.3 . . ?
N1 C12 C11 113.1(3) . . ?
N1 C12 H12A 108.9 . . ?
C11 C12 H12A 108.9 . . ?
N1 C12 H12B 108.9 . . ?
C11 C12 H12B 108.9 . . ?
H12A C12 H12B 107.8 . . ?
N1 C13 C14 114.3(2) . . ?
N1 C13 H13A 108.7 . . ?
C14 C13 H13A 108.7 . . ?
N1 C13 H13B 108.7 . . ?
C14 C13 H13B 108.7 . . ?
H13A C13 H13B 107.6 . . ?
O5 C14 C13 109.2(2) . . ?
O5 C14 H14A 109.8 . . ?
C13 C14 H14A 109.8 . . ?
O5 C14 H14B 109.8 . . ?
C13 C14 H14B 109.8 . . ?
H14A C14 H14B 108.3 . . ?
O5 C15 C16 109.4(2) . . ?
O5 C15 H15A 109.8 . . ?
C16 C15 H15A 109.8 . . ?
O5 C15 H15B 109.8 . . ?
C16 C15 H15B 109.8 . . ?
H15A C15 H15B 108.2 . . ?
O6 C16 C15 109.4(2) . . ?
O6 C16 H16A 109.8 . . ?
C15 C16 H16A 109.8 . . ?
O6 C16 H16B 109.8 . . ?
C15 C16 H16B 109.8 . . ?
H16A C16 H16B 108.2 . . ?
O6 C17 C18 108.6(2) . . ?
O6 C17 H17A 110.0 . . ?
C18 C17 H17A 110.0 . . ?
O6 C17 H17B 110.0 . . ?
C18 C17 H17B 110.0 . . ?
H17A C17 H17B 108.4 . . ?
N2 C18 C17 113.5(2) . . ?
N2 C18 H18A 108.9 . . ?
C17 C18 H18A 108.9 . . ?
N2 C18 H18B 108.9 . . ?
C17 C18 H18B 108.9 . . ?
H18A C18 H18B 107.7 . . ?
N3 C19 C20 114.2(3) . . ?
N3 C19 H19A 108.7 . . ?
C20 C19 H19A 108.7 . . ?
N3 C19 H19B 108.7 . . ?
C20 C19 H19B 108.7 . . ?
H19A C19 H19B 107.6 . . ?
O7 C20 C19 109.0(3) . . ?
O7 C20 H20A 109.9 . . ?
C19 C20 H20A 109.9 . . ?
O7 C20 H20B 109.9 . . ?
C19 C20 H20B 109.9 . . ?
H20A C20 H20B 108.3 . . ?
O7 C21 C22 109.4(2) . . ?
O7 C21 H21A 109.8 . . ?
C22 C21 H21A 109.8 . . ?
O7 C21 H21B 109.8 . . ?
C22 C21 H21B 109.8 . . ?
H21A C21 H21B 108.2 . . ?
O8 C22 C21 109.1(2) . . ?
O8 C22 H22A 109.9 . . ?
C21 C22 H22A 109.9 . . ?
O8 C22 H22B 109.9 . . ?
C21 C22 H22B 109.9 . . ?
H22A C22 H22B 108.3 . . ?
O8 C23 C24 108.6(2) . . ?
O8 C23 H23A 110.0 . . ?
C24 C23 H23A 110.0 . . ?
O8 C23 H23B 110.0 . . ?
C24 C23 H23B 110.0 . . ?
H23A C23 H23B 108.4 . . ?
N4 C24 C23 114.0(2) . . ?
N4 C24 H24A 108.7 . . ?
C23 C24 H24A 108.7 . . ?
N4 C24 H24B 108.7 . . ?
C23 C24 H24B 108.7 . . ?
H24A C24 H24B 107.6 . . ?
N4 C26 C27 113.9(3) . . ?
N4 C26 H26A 108.8 . . ?
C27 C26 H26A 108.8 . . ?
N4 C26 H26B 108.8 . . ?
C27 C26 H26B 108.8 . . ?
H26A C26 H26B 107.7 . . ?
O9 C27 C26 109.4(2) . . ?
O9 C27 H27A 109.8 . . ?
C26 C27 H27A 109.8 . . ?
O9 C27 H27B 109.8 . . ?
C26 C27 H27B 109.8 . . ?
H27A C27 H27B 108.2 . . ?
O9 C28 C29 109.6(3) . . ?
O9 C28 H28A 109.8 . . ?
C29 C28 H28A 109.8 . . ?
O9 C28 H28B 109.8 . . ?
C29 C28 H28B 109.8 . . ?
H28A C28 H28B 108.2 . . ?
O10 C29 C28 109.7(3) . . ?
O10 C29 H29A 109.7 . . ?
C28 C29 H29A 109.7 . . ?
O10 C29 H29B 109.7 . . ?
C28 C29 H29B 109.7 . . ?
H29A C29 H29B 108.2 . . ?
O10 C30 C31 109.5(3) . . ?
O10 C30 H30A 109.8 . . ?
C31 C30 H30A 109.8 . . ?
O10 C30 H30B 109.8 . . ?
C31 C30 H30B 109.8 . . ?
H30A C30 H30B 108.2 . . ?
N3 C31 C30 113.9(3) . . ?
N3 C31 H31A 108.8 . . ?
C30 C31 H31A 108.8 . . ?
N3 C31 H31B 108.8 . . ?
C30 C31 H31B 108.8 . . ?
H31A C31 H31B 107.7 . . ?
N3 C32 C33 114.8(3) . . ?
N3 C32 H32A 108.6 . . ?
C33 C32 H32A 108.6 . . ?
N3 C32 H32B 108.6 . . ?
C33 C32 H32B 108.6 . . ?
H32A C32 H32B 107.5 . . ?
O11 C33 C32 109.3(2) . . ?
O11 C33 H33A 109.8 . . ?
C32 C33 H33A 109.8 . . ?
O11 C33 H33B 109.8 . . ?
C32 C33 H33B 109.8 . . ?
H33A C33 H33B 108.3 . . ?
O11 C34 C35 109.1(2) . . ?
O11 C34 H34A 109.9 . . ?
C35 C34 H34A 109.9 . . ?
O11 C34 H34B 109.9 . . ?
C35 C34 H34B 109.9 . . ?
H34A C34 H34B 108.3 . . ?
O12 C35 C34 109.6(2) . . ?
O12 C35 H35A 109.8 . . ?
C34 C35 H35A 109.8 . . ?
O12 C35 H35B 109.8 . . ?
C34 C35 H35B 109.8 . . ?
H35A C35 H35B 108.2 . . ?
O12 C36 C37 109.3(2) . . ?
O12 C36 H36A 109.8 . . ?
C37 C36 H36A 109.8 . . ?
O12 C36 H36B 109.8 . . ?
C37 C36 H36B 109.8 . . ?
H36A C36 H36B 108.3 . . ?
N4 C37 C36 114.7(2) . . ?
N4 C37 H37A 108.6 . . ?
C36 C37 H37A 108.6 . . ?
N4 C37 H37B 108.6 . . ?
C36 C37 H37B 108.6 . . ?
H37A C37 H37B 107.6 . . ?
C13 N1 C12 110.0(2) . . ?
C13 N1 C1 110.5(2) . . ?
C12 N1 C1 109.3(2) . . ?
C13 N1 K10 108.14(17) . . ?
C12 N1 K10 109.54(17) . . ?
C1 N1 K10 109.26(18) . . ?
C18 N2 C6 109.8(2) . . ?
C18 N2 C7 110.5(2) . . ?
C6 N2 C7 110.2(2) . . ?
C18 N2 K10 110.51(16) . . ?
C6 N2 K10 109.33(16) . . ?
C7 N2 K10 106.42(16) . . ?
C19 N3 C32 110.0(2) . . ?
C19 N3 C31 110.1(3) . . ?
C32 N3 C31 110.6(2) . . ?
C19 N3 K11 108.72(17) . . ?
C32 N3 K11 108.81(17) . . ?
C31 N3 K11 108.60(18) . . ?
C26 N4 C37 109.9(2) . . ?
C26 N4 C24 110.3(2) . . ?
C37 N4 C24 110.1(2) . . ?
C26 N4 K11 109.54(17) . . ?
C37 N4 K11 108.66(17) . . ?
C24 N4 K11 108.32(16) . . ?
C3 O1 C2 110.9(2) . . ?
C3 O1 K10 116.22(17) . . ?
C2 O1 K10 120.12(18) . . ?
C4 O2 C5 110.9(2) . . ?
C4 O2 K10 113.71(17) . . ?
C5 O2 K10 117.98(16) . . ?
C9 O3 C8 111.1(2) . . ?
C9 O3 K10 117.46(16) . . ?
C8 O3 K10 117.69(15) . . ?
C11 O4 C10 110.7(2) . . ?
C11 O4 K10 116.52(17) . . ?
C10 O4 K10 111.58(17) . . ?
C14 O5 C15 110.8(2) . . ?
C14 O5 K10 115.54(16) . . ?
C15 O5 K10 112.81(16) . . ?
C17 O6 C16 111.4(2) . . ?
C17 O6 K10 118.80(16) . . ?
C16 O6 K10 115.36(16) . . ?
C21 O7 C20 110.7(2) . . ?
C21 O7 K11 117.94(15) . . ?
C20 O7 K11 117.56(16) . . ?
C22 O8 C23 109.9(2) . . ?
C22 O8 K11 114.24(15) . . ?
C23 O8 K11 119.40(16) . . ?
C27 O9 C28 110.7(2) . . ?
C27 O9 K11 120.75(16) . . ?
C28 O9 K11 115.48(17) . . ?
C30 O10 C29 110.7(2) . . ?
C30 O10 K11 117.30(18) . . ?
C29 O10 K11 113.65(17) . . ?
C34 O11 C33 110.3(2) . . ?
C34 O11 K11 114.00(16) . . ?
C33 O11 K11 117.48(16) . . ?
C36 O12 C35 110.8(2) . . ?
C36 O12 K11 117.13(17) . . ?
C35 O12 K11 117.55(16) . . ?
N5 C40 C41 111.0(3) . . ?
N6 C41 C40 111.0(3) . . ?
N8 C42 C43 112.0(3) . . ?
N8 C42 N18 128.1(8) . . ?
C43 C42 N18 102.0(8) . . ?
N7 C43 C42 111.1(3) . . ?
N9 C45 C44 105.8(5) . . ?
C45 C44 N10 94.1(6) . . ?
N21 C144 C145 94.3(12) . . ?
N21 C144 N20 31.6(7) . . ?
C145 C144 N20 119.5(11) . . ?
N19 C145 C144 115.8(11) . . ?
N21 N20 C144 63.7(13) . . ?
N20 N21 C144 84.7(14) . . ?
 
_diffrn_measured_fraction_theta_max    1.000
_diffrn_reflns_theta_full              25.00
_diffrn_measured_fraction_theta_full   1.000
_refine_diff_density_max    0.758
_refine_diff_density_min   -0.499
_refine_diff_density_rms    0.075


# start Validation Reply Form

_vrf_PLAT430_ge9-methylcyclopropane
;
PROBLEM: Short Inter D...A Contact  N9     ..  N18     ..       1.97 Ang. 
RESPONSE: N9 and N18 are part of the disordered solvent molecule.  Due to
the disorder and the partial occupancy, the apparent "short contact" 
is an artifact.
;
_vrf_PLAT221_ge9-methylcyclopropane
;
PROBLEM: Large Solvent/Anion  C     Ueq(max)/Ueq(min) ...       4.69 Ratio 
RESPONSE: The carbon atom is part of disordered solvent molecule.  
Due to the disorder and partial occupancy, the Ueq's are large.
;

# end Validation Reply Form

#===END
  
data_ge9-pentyne
 
_audit_creation_method            SHELXL-97
_chemical_name_systematic
;
 (K-crypt)3[Ge9-(C(CH3)=CHCH2CH3)]0.5[Ge9-(C(CH2CH3)=CHCH3)]0.5 0.4bz
;
_chemical_name_common             ?
_chemical_melting_point           ?
_chemical_formula_moiety          
;
 3(C18 H36 K N2 O6) C5 H7 Ge9 0.21(C6 H6)
;
_chemical_formula_sum
 'C60.25 H116.10 Ge9 K3 N6 O18'
_chemical_formula_weight          1983.53
 
loop_
 _atom_type_symbol
 _atom_type_description
 _atom_type_scat_dispersion_real
 _atom_type_scat_dispersion_imag
 _atom_type_scat_source
 'C'  'C'   0.0033   0.0016
 'International Tables Vol C Tables 4.2.6.8 and 6.1.1.4'
 'H'  'H'   0.0000   0.0000
 'International Tables Vol C Tables 4.2.6.8 and 6.1.1.4'
 'N'  'N'   0.0061   0.0033
 'International Tables Vol C Tables 4.2.6.8 and 6.1.1.4'
 'O'  'O'   0.0106   0.0060
 'International Tables Vol C Tables 4.2.6.8 and 6.1.1.4'
 'K'  'K'   0.2009   0.2494
 'International Tables Vol C Tables 4.2.6.8 and 6.1.1.4'
 'Ge'  'Ge'   0.1547   1.8001
 'International Tables Vol C Tables 4.2.6.8 and 6.1.1.4'
 
_symmetry_cell_setting            Triclinic
_symmetry_space_group_name_H-M    P-1
 
loop_
 _symmetry_equiv_pos_as_xyz
 'x, y, z'
 '-x, -y, -z'
 
_cell_length_a                    14.2449(4)
_cell_length_b                    14.3354(4)
_cell_length_c                    20.8288(6)
_cell_angle_alpha                 94.688(2)
_cell_angle_beta                  94.819(2)
_cell_angle_gamma                 102.300(2)
_cell_volume                      4119.3(2)
_cell_formula_units_Z             2
_cell_measurement_temperature     100(2)
_cell_measurement_reflns_used     ?
_cell_measurement_theta_min       ?
_cell_measurement_theta_max       ?
 
_exptl_crystal_description        'parallelepiped'
_exptl_crystal_colour             'red'
_exptl_crystal_size_max           0.25
_exptl_crystal_size_mid           0.21
_exptl_crystal_size_min           0.11
_exptl_crystal_density_meas       ?
_exptl_crystal_density_diffrn     1.603
_exptl_crystal_density_method     'not measured'
_exptl_crystal_F_000              2025
_exptl_absorpt_coefficient_mu     3.449
_exptl_absorpt_correction_type    'multi-scan'
_exptl_absorpt_correction_T_min   0.4793
_exptl_absorpt_correction_T_max   0.7028
_exptl_absorpt_process_details    'SADABS'
 
_exptl_special_details
;
 ?
;
 
_diffrn_ambient_temperature       100(2)
_diffrn_radiation_wavelength      0.71073
_diffrn_radiation_type            MoK\a
_diffrn_radiation_source          'fine-focus sealed tube'
_diffrn_radiation_monochromator   graphite
_diffrn_measurement_device_type   'CCD Area Detector'
_diffrn_measurement_method        'Phi and Omega Scans'
_diffrn_detector_area_resol_mean  ?
_diffrn_standards_number          ?
_diffrn_standards_interval_count  ?
_diffrn_standards_interval_time   ?
_diffrn_standards_decay_%         ?
_diffrn_reflns_number             63370
_diffrn_reflns_av_R_equivalents   0.0428
_diffrn_reflns_av_sigmaI/netI     0.0372
_diffrn_reflns_limit_h_min        -16
_diffrn_reflns_limit_h_max        16
_diffrn_reflns_limit_k_min        -17
_diffrn_reflns_limit_k_max        17
_diffrn_reflns_limit_l_min        -24
_diffrn_reflns_limit_l_max        24
_diffrn_reflns_theta_min          0.99
_diffrn_reflns_theta_max          25.00
_reflns_number_total              14490
_reflns_number_gt                 11520
_reflns_threshold_expression      >2sigma(I)
 
_computing_data_collection       'APEX2 (Bruker, 2004)'
_computing_cell_refinement       'APEX2/SAINT (Bruker, 2004)'
_computing_data_reduction        'SAINT/XPREP (Bruker, 2004; Sheldrick, 2003)'
_computing_structure_solution    'SHELXS-97 (Sheldrick, 1990)'
_computing_structure_refinement  'SHELXL-97 (Sheldrick, 1997)'
_computing_molecular_graphics    'XP (Sheldrick, 1998)'
_computing_publication_material  'XCIF (Sheldrick, 2001)'
 
_refine_special_details
;
 Refinement of F^2^ against ALL reflections.  The weighted R-factor wR and
 goodness of fit S are based on F^2^, conventional R-factors R are based
 on F, with F set to zero for negative F^2^. The threshold expression of
 F^2^ > 2sigma(F^2^) is used only for calculating R-factors(gt) etc. and is
 not relevant to the choice of reflections for refinement.  R-factors based
 on F^2^ are statistically about twice as large as those based on F, and R-
 factors based on ALL data will be even larger.
;
 
_refine_ls_structure_factor_coef  Fsqd
_refine_ls_matrix_type            full
_refine_ls_weighting_scheme       calc
_refine_ls_weighting_details
 'calc w=1/[\s^2^(Fo^2^)+(0.0417P)^2^+16.8975P] where P=(Fo^2^+2Fc^2^)/3'
_atom_sites_solution_primary      direct
_atom_sites_solution_secondary    difmap
_atom_sites_solution_hydrogens    geom
_refine_ls_hydrogen_treatment     constr
_refine_ls_extinction_method      none
_refine_ls_extinction_coef        ?
_refine_ls_number_reflns          14490
_refine_ls_number_parameters      945
_refine_ls_number_restraints      11
_refine_ls_R_factor_all           0.0654
_refine_ls_R_factor_gt            0.0477
_refine_ls_wR_factor_ref          0.1217
_refine_ls_wR_factor_gt           0.1123
_refine_ls_goodness_of_fit_ref    1.095
_refine_ls_restrained_S_all       1.103
_refine_ls_shift/su_max           0.003
_refine_ls_shift/su_mean          0.000
 
loop_
 _atom_site_label
 _atom_site_type_symbol
 _atom_site_fract_x
 _atom_site_fract_y
 _atom_site_fract_z
 _atom_site_U_iso_or_equiv
 _atom_site_adp_type
 _atom_site_occupancy
 _atom_site_symmetry_multiplicity
 _atom_site_calc_flag
 _atom_site_refinement_flags
 _atom_site_disorder_assembly
 _atom_site_disorder_group
Ge2 Ge 0.85735(17) 0.79745(17) 0.32485(11) 0.0238(4) Uani 0.761(4) 1 d P A 7
Ge4 Ge 0.8655(2) 0.6228(2) 0.3467(2) 0.0224(4) Uani 0.761(4) 1 d P A 7
Ge5 Ge 0.6898(4) 0.6476(4) 0.3225(3) 0.0248(5) Uani 0.761(4) 1 d P A 7
Ge6 Ge 0.76929(11) 0.52828(12) 0.24372(8) 0.0249(3) Uani 0.761(4) 1 d P A 7
Ge8 Ge 0.86263(10) 0.82204(10) 0.20413(8) 0.0301(3) Uani 0.761(4) 1 d P A 7
Ge9 Ge 0.79469(7) 0.65098(12) 0.15972(4) 0.0292(4) Uani 0.761(4) 1 d P A 7
C905 C 0.7317(11) 0.6779(11) 0.0123(8) 0.099(5) Uiso 0.761(4) 1 d P A 7
H90A H 0.7422 0.7214 0.0529 0.119 Uiso 0.761(4) 1 calc PR A 7
H90B H 0.7517 0.7165 -0.0235 0.119 Uiso 0.761(4) 1 calc PR A 7
C904 C 0.6396(12) 0.6343(12) 0.0005(8) 0.124(5) Uiso 0.761(4) 1 d P A 7
H90C H 0.6003 0.6822 -0.0038 0.185 Uiso 0.761(4) 1 calc PR A 7
H90D H 0.6203 0.5967 0.0364 0.185 Uiso 0.761(4) 1 calc PR A 7
H90E H 0.6299 0.5914 -0.0398 0.185 Uiso 0.761(4) 1 calc PR A 7
C903 C 0.8257(8) 0.5831(8) 0.0765(6) 0.070(3) Uiso 0.761(4) 1 d PD A 7
C902 C 0.7895(9) 0.6033(9) 0.0183(7) 0.085(4) Uiso 0.761(4) 1 d P A 7
H902 H 0.8013 0.5687 -0.0200 0.102 Uiso 0.761(4) 1 calc PR A 7
C901 C 0.8836(10) 0.5024(9) 0.0769(7) 0.103(4) Uiso 0.761(4) 1 d PD A 7
H90F H 0.9039 0.4936 0.1218 0.155 Uiso 0.761(4) 1 calc PR A 7
H90G H 0.9407 0.5204 0.0537 0.155 Uiso 0.761(4) 1 calc PR A 7
H90I H 0.8425 0.4423 0.0556 0.155 Uiso 0.761(4) 1 calc PR A 7
Ge12 Ge 0.8489(8) 0.7867(8) 0.3433(5) 0.053(2) Uani 0.239(4) 1 d P A 6
Ge14 Ge 0.8592(10) 0.6177(10) 0.3353(8) 0.054(4) Uani 0.239(4) 1 d P A 6
Ge15 Ge 0.6886(15) 0.6649(13) 0.3343(9) 0.041(3) Uani 0.239(4) 1 d P A 6
Ge16 Ge 0.7730(7) 0.5503(6) 0.2270(5) 0.083(3) Uani 0.239(4) 1 d P A 6
Ge18 Ge 0.8812(4) 0.8442(4) 0.2339(4) 0.0603(15) Uani 0.239(4) 1 d P A 6
Ge19 Ge 0.7800(2) 0.7035(5) 0.15655(16) 0.0470(12) Uani 0.239(4) 1 d PD A 6
C703 C 0.769(3) 0.685(2) 0.0180(14) 0.085(4) Uiso 0.239(4) 1 d PD A 6
C702 C 0.802(2) 0.635(2) 0.0627(12) 0.070(3) Uiso 0.239(4) 1 d PD A 6
C701 C 0.842(2) 0.5505(19) 0.0475(15) 0.099(5) Uiso 0.239(4) 1 d PD A 6
C704 C 0.945(3) 0.560(3) 0.076(3) 0.124(5) Uiso 0.239(4) 1 d PD A 6
C705 C 0.732(3) 0.775(2) 0.032(2) 0.103(4) Uiso 0.239(4) 1 d PD A 6
Ge1 Ge 0.69553(4) 0.79445(4) 0.25513(3) 0.03072(15) Uani 1 1 d . . .
Ge3 Ge 0.94020(4) 0.68115(4) 0.24409(3) 0.03289(15) Uani 1 1 d . . .
Ge7 Ge 0.63140(4) 0.61744(4) 0.20179(3) 0.03582(16) Uani 1 1 d . A .
K13 K 0.67002(8) 0.19564(8) 0.48544(5) 0.0243(2) Uani 1 1 d . . .
K11 K 0.18709(8) 0.30255(8) 0.30740(6) 0.0281(3) Uani 1 1 d . . .
K12 K 0.72060(11) 0.16839(11) 0.00544(7) 0.0516(4) Uani 1 1 d . . .
O3 O 0.2403(3) 0.3438(3) 0.44176(18) 0.0338(9) Uani 1 1 d . . .
O6 O 0.1263(3) 0.0972(3) 0.3024(2) 0.0399(10) Uani 1 1 d . . .
O10 O 0.6782(3) 0.0398(3) 0.39857(18) 0.0309(8) Uani 1 1 d . . .
O8 O 0.7719(3) 0.3798(3) 0.52698(18) 0.0313(8) Uani 1 1 d . . .
O11 O 0.5842(2) 0.1768(3) 0.60169(17) 0.0312(8) Uani 1 1 d . . .
O7 O 0.6846(3) 0.3321(2) 0.39696(17) 0.0312(8) Uani 1 1 d . . .
O4 O 0.3805(3) 0.4018(3) 0.3566(2) 0.0364(9) Uani 1 1 d . . .
O1 O 0.0046(3) 0.3449(3) 0.3027(2) 0.0405(10) Uani 1 1 d . . .
O9 O 0.8246(3) 0.0989(3) 0.50225(18) 0.0312(8) Uani 1 1 d . . .
O13 O 0.4673(2) 0.1849(3) 0.48558(17) 0.0304(8) Uani 1 1 d . . .
N13 N 0.7943(3) 0.2317(3) 0.6099(2) 0.0306(10) Uani 1 1 d . . .
O5 O 0.2304(3) 0.1780(4) 0.2054(2) 0.0517(12) Uani 1 1 d . . .
O2 O 0.1445(3) 0.4467(3) 0.2313(2) 0.0586(13) Uani 1 1 d . . .
N12 N 0.0495(3) 0.2196(3) 0.3992(2) 0.0361(11) Uani 1 1 d . . .
O14 O 0.6144(3) 0.0079(3) -0.0801(2) 0.0478(11) Uani 1 1 d . A .
C33 C 0.7058(4) 0.4268(4) 0.4292(3) 0.0353(13) Uani 1 1 d . . .
H33A H 0.6499 0.4373 0.4519 0.042 Uiso 1 1 calc R . .
H33B H 0.7173 0.4741 0.3971 0.042 Uiso 1 1 calc R . .
C31 C 0.5814(4) 0.2201(4) 0.3161(3) 0.0346(13) Uani 1 1 d . . .
H31A H 0.5348 0.2158 0.2774 0.042 Uiso 1 1 calc R . .
H31B H 0.6397 0.2010 0.3016 0.042 Uiso 1 1 calc R . .
C27 C 0.8069(4) 0.0062(4) 0.4677(3) 0.0356(13) Uani 1 1 d . . .
H27A H 0.7607 -0.0394 0.4894 0.043 Uiso 1 1 calc R . .
H27B H 0.8680 -0.0163 0.4680 0.043 Uiso 1 1 calc R . .
C20 C 0.6411(4) 0.2021(5) 0.6623(3) 0.0405(14) Uani 1 1 d . . .
H20A H 0.6084 0.1656 0.6955 0.049 Uiso 1 1 calc R . .
H20B H 0.6481 0.2713 0.6755 0.049 Uiso 1 1 calc R . .
C36 C 0.8217(5) 0.3359(4) 0.6303(3) 0.0434(15) Uani 1 1 d . . .
H36A H 0.8761 0.3486 0.6650 0.052 Uiso 1 1 calc R . .
H36B H 0.7664 0.3563 0.6485 0.052 Uiso 1 1 calc R . .
C26 C 0.8670(4) 0.0989(4) 0.5668(3) 0.0375(14) Uani 1 1 d . . .
H26A H 0.9295 0.0794 0.5655 0.045 Uiso 1 1 calc R . .
H26B H 0.8240 0.0516 0.5893 0.045 Uiso 1 1 calc R . .
C19 C 0.7393(4) 0.1805(5) 0.6580(3) 0.0368(13) Uani 1 1 d . . .
H19A H 0.7770 0.1979 0.7011 0.044 Uiso 1 1 calc R . .
H19B H 0.7316 0.1106 0.6470 0.044 Uiso 1 1 calc R . .
C28 C 0.7671(4) 0.0080(4) 0.4000(3) 0.0354(13) Uani 1 1 d . . .
H28A H 0.8142 0.0518 0.3778 0.042 Uiso 1 1 calc R . .
H28B H 0.7556 -0.0570 0.3767 0.042 Uiso 1 1 calc R . .
C22 C 0.4294(4) 0.1654(5) 0.5455(3) 0.0362(13) Uani 1 1 d . . .
H22A H 0.4165 0.0955 0.5492 0.043 Uiso 1 1 calc R . .
H22B H 0.3676 0.1863 0.5469 0.043 Uiso 1 1 calc R . .
C35 C 0.8511(4) 0.3949(4) 0.5759(3) 0.0443(15) Uani 1 1 d . . .
H35A H 0.8703 0.4637 0.5924 0.053 Uiso 1 1 calc R . .
H35B H 0.9070 0.3760 0.5577 0.053 Uiso 1 1 calc R . .
C32 C 0.6094(4) 0.3234(4) 0.3464(3) 0.0361(13) Uani 1 1 d . . .
H32A H 0.6312 0.3665 0.3133 0.043 Uiso 1 1 calc R . .
H32B H 0.5527 0.3421 0.3639 0.043 Uiso 1 1 calc R . .
C21 C 0.4995(4) 0.2171(5) 0.6005(3) 0.0397(14) Uani 1 1 d . . .
H21A H 0.5173 0.2864 0.5950 0.048 Uiso 1 1 calc R . .
H21B H 0.4702 0.2097 0.6418 0.048 Uiso 1 1 calc R . .
C25 C 0.8831(4) 0.1961(4) 0.6034(3) 0.0351(13) Uani 1 1 d . . .
H25A H 0.9147 0.1937 0.6473 0.042 Uiso 1 1 calc R . .
H25B H 0.9280 0.2423 0.5813 0.042 Uiso 1 1 calc R . .
C24 C 0.4398(4) 0.1627(4) 0.3703(3) 0.0345(13) Uani 1 1 d . . .
H24A H 0.3945 0.1262 0.3338 0.041 Uiso 1 1 calc R . .
H24B H 0.4374 0.2312 0.3702 0.041 Uiso 1 1 calc R . .
C23 C 0.4073(4) 0.1281(4) 0.4326(3) 0.0342(13) Uani 1 1 d . . .
H23A H 0.3394 0.1326 0.4355 0.041 Uiso 1 1 calc R . .
H23B H 0.4110 0.0600 0.4338 0.041 Uiso 1 1 calc R . .
C29 C 0.6329(5) 0.0285(4) 0.3344(3) 0.0429(15) Uani 1 1 d . . .
H29A H 0.6259 -0.0384 0.3153 0.051 Uiso 1 1 calc R . .
H29B H 0.6732 0.0716 0.3076 0.051 Uiso 1 1 calc R . .
C34 C 0.7926(4) 0.4410(4) 0.4767(3) 0.0339(13) Uani 1 1 d . . .
H34A H 0.8472 0.4257 0.4547 0.041 Uiso 1 1 calc R . .
H34B H 0.8112 0.5088 0.4955 0.041 Uiso 1 1 calc R . .
C13 C -0.0465(4) 0.2363(5) 0.3796(3) 0.0446(16) Uani 1 1 d . . .
H13A H -0.0859 0.2275 0.4164 0.054 Uiso 1 1 calc R . .
H13B H -0.0783 0.1872 0.3437 0.054 Uiso 1 1 calc R . .
C4 C 0.3407(4) 0.3733(4) 0.4629(3) 0.0357(13) Uani 1 1 d . . .
H4A H 0.3711 0.3173 0.4601 0.043 Uiso 1 1 calc R . .
H4B H 0.3502 0.4017 0.5086 0.043 Uiso 1 1 calc R . .
C9 C 0.2167(5) 0.0785(6) 0.2139(4) 0.061(2) Uani 1 1 d . . .
H9A H 0.2702 0.0678 0.2439 0.073 Uiso 1 1 calc R . .
H9B H 0.2165 0.0410 0.1718 0.073 Uiso 1 1 calc R . .
C6 C 0.0836(4) 0.2656(5) 0.4655(3) 0.0447(15) Uani 1 1 d . . .
H6A H 0.0493 0.2258 0.4966 0.054 Uiso 1 1 calc R . .
H6B H 0.0664 0.3290 0.4701 0.054 Uiso 1 1 calc R . .
C5 C 0.1911(4) 0.2793(5) 0.4828(3) 0.0391(14) Uani 1 1 d . . .
H5A H 0.2085 0.3058 0.5287 0.047 Uiso 1 1 calc R . .
H5B H 0.2100 0.2168 0.4770 0.047 Uiso 1 1 calc R . .
C12 C 0.0471(4) 0.1167(4) 0.3966(3) 0.0428(15) Uani 1 1 d . . .
H12A H -0.0080 0.0857 0.4191 0.051 Uiso 1 1 calc R . .
H12B H 0.1069 0.1080 0.4209 0.051 Uiso 1 1 calc R . .
C11 C 0.0382(4) 0.0659(4) 0.3303(3) 0.0419(15) Uani 1 1 d . . .
H11A H 0.0254 -0.0043 0.3325 0.050 Uiso 1 1 calc R . .
H11B H -0.0163 0.0806 0.3032 0.050 Uiso 1 1 calc R . .
C40 C 0.5721(5) -0.0745(4) -0.0500(3) 0.0479(17) Uani 1 1 d . . .
H40A H 0.5527 -0.1310 -0.0827 0.057 Uiso 1 1 calc R A .
H40B H 0.5135 -0.0637 -0.0307 0.057 Uiso 1 1 calc R . .
C3 C 0.3860(4) 0.4457(4) 0.4207(3) 0.0423(15) Uani 1 1 d . . .
H3A H 0.3520 0.4992 0.4209 0.051 Uiso 1 1 calc R . .
H3B H 0.4544 0.4723 0.4374 0.051 Uiso 1 1 calc R . .
C15 C -0.0029(5) 0.4326(5) 0.2763(4) 0.0522(18) Uani 1 1 d . . .
H15A H 0.0268 0.4877 0.3087 0.063 Uiso 1 1 calc R . .
H15B H -0.0719 0.4336 0.2666 0.063 Uiso 1 1 calc R . .
C14 C -0.0455(4) 0.3339(5) 0.3580(3) 0.0470(16) Uani 1 1 d . . .
H14A H -0.1125 0.3412 0.3478 0.056 Uiso 1 1 calc R . .
H14B H -0.0135 0.3841 0.3932 0.056 Uiso 1 1 calc R . .
C2 C 0.4285(4) 0.4654(4) 0.3153(4) 0.0484(17) Uani 1 1 d . . .
H2A H 0.4967 0.4901 0.3332 0.058 Uiso 1 1 calc R . .
H2B H 0.3974 0.5206 0.3124 0.058 Uiso 1 1 calc R . .
C41 C 0.6441(5) -0.0928(5) 0.0021(4) 0.0570(19) Uani 1 1 d . A .
H41A H 0.6174 -0.1532 0.0206 0.068 Uiso 1 1 calc R . .
H41B H 0.7044 -0.0992 -0.0164 0.068 Uiso 1 1 calc R . .
C17 C 0.1909(6) 0.4559(7) 0.1724(5) 0.085(3) Uani 1 1 d . . .
H17A H 0.1769 0.5116 0.1514 0.102 Uiso 1 1 calc R . .
H17B H 0.1665 0.3974 0.1418 0.102 Uiso 1 1 calc R . .
C16 C 0.0448(5) 0.4422(5) 0.2178(3) 0.0517(17) Uani 1 1 d . . .
H16A H 0.0159 0.3867 0.1856 0.062 Uiso 1 1 calc R . .
H16B H 0.0354 0.5012 0.1990 0.062 Uiso 1 1 calc R . .
O15 O 0.6635(3) -0.0144(3) 0.0513(2) 0.0524(12) Uani 1 1 d . A .
O17 O 0.6868(4) 0.2822(4) 0.1140(2) 0.0681(16) Uani 1 1 d . A .
O16 O 0.5842(5) 0.2944(4) -0.0040(2) 0.0782(17) Uani 1 1 d . A .
N15 N 0.6372(5) 0.2014(5) -0.1238(3) 0.0658(18) Uani 1 1 d . A .
N16 N 0.7982(5) 0.1375(6) 0.1395(3) 0.077(2) Uani 1 1 d . A .
N14 N 0.5382(3) 0.1522(3) 0.3604(2) 0.0313(10) Uani 1 1 d . . .
N11 N 0.3257(4) 0.3843(5) 0.2145(3) 0.0603(17) Uani 1 1 d . . .
C30 C 0.5352(5) 0.0521(4) 0.3345(3) 0.0397(14) Uani 1 1 d . . .
H30A H 0.5032 0.0409 0.2896 0.048 Uiso 1 1 calc R . .
H30B H 0.4953 0.0079 0.3608 0.048 Uiso 1 1 calc R . .
C50 C 0.7176(7) 0.2630(6) -0.1538(4) 0.073(3) Uani 1 1 d . . .
H50A H 0.6965 0.2645 -0.2001 0.088 Uiso 1 1 calc R A .
H50B H 0.7294 0.3294 -0.1326 0.088 Uiso 1 1 calc R . .
C10 C 0.1231(5) 0.0465(5) 0.2407(3) 0.0511(17) Uani 1 1 d . . .
H10A H 0.0698 0.0588 0.2113 0.061 Uiso 1 1 calc R . .
H10B H 0.1111 -0.0233 0.2447 0.061 Uiso 1 1 calc R . .
C8 C 0.3199(5) 0.2107(7) 0.1795(4) 0.071(3) Uani 1 1 d . . .
H8A H 0.3251 0.1672 0.1411 0.086 Uiso 1 1 calc R . .
H8B H 0.3746 0.2116 0.2123 0.086 Uiso 1 1 calc R . .
C1 C 0.4241(4) 0.4135(6) 0.2492(4) 0.0562(19) Uani 1 1 d . . .
H1A H 0.4660 0.4556 0.2227 0.067 Uiso 1 1 calc R . .
H1B H 0.4505 0.3555 0.2534 0.067 Uiso 1 1 calc R . .
C156 C 0.7442(6) 0.0470(6) 0.1554(4) 0.071(2) Uani 1 1 d . . .
H15C H 0.6816 0.0569 0.1688 0.085 Uiso 1 1 calc R A .
H15D H 0.7799 0.0286 0.1935 0.085 Uiso 1 1 calc R . .
C7 C 0.3228(6) 0.3102(9) 0.1606(4) 0.087(3) Uani 1 1 d . . .
H7A H 0.3804 0.3299 0.1373 0.104 Uiso 1 1 calc R . .
H7B H 0.2651 0.3080 0.1300 0.104 Uiso 1 1 calc R . .
C39 C 0.5479(5) 0.0301(6) -0.1280(3) 0.062(2) Uani 1 1 d . . .
H39A H 0.4949 0.0513 -0.1072 0.074 Uiso 1 1 calc R A .
H39B H 0.5194 -0.0277 -0.1584 0.074 Uiso 1 1 calc R . .
C38 C 0.5998(6) 0.1093(6) -0.1648(3) 0.063(2) Uani 1 1 d . A .
H38A H 0.6544 0.0884 -0.1837 0.075 Uiso 1 1 calc R . .
H38B H 0.5547 0.1196 -0.2010 0.075 Uiso 1 1 calc R . .
C47 C 0.6101(8) 0.3286(6) 0.1102(4) 0.079(3) Uani 1 1 d . . .
H47A H 0.6197 0.3799 0.1465 0.095 Uiso 1 1 calc R A .
H47B H 0.5489 0.2821 0.1139 0.095 Uiso 1 1 calc R . .
C51 C 0.8103(7) 0.2298(8) -0.1485(4) 0.093(3) Uani 1 1 d . A .
H51A H 0.7986 0.1648 -0.1719 0.112 Uiso 1 1 calc R B 3
H51B H 0.8576 0.2728 -0.1712 0.112 Uiso 1 1 calc R B 3
C44 C 0.5563(8) 0.2468(7) -0.1184(4) 0.093(3) Uani 1 1 d . . .
H44A H 0.4999 0.1989 -0.1083 0.111 Uiso 1 1 calc R A .
H44B H 0.5391 0.2693 -0.1606 0.111 Uiso 1 1 calc R . .
C48 C 0.7002(7) 0.2499(6) 0.1758(3) 0.081(3) Uani 1 1 d . . .
H48A H 0.6460 0.1958 0.1809 0.097 Uiso 1 1 calc R A .
H48B H 0.7008 0.3025 0.2098 0.097 Uiso 1 1 calc R . .
C42 C 0.7242(6) -0.0337(7) 0.1051(4) 0.074(2) Uani 1 1 d . A .
H42A H 0.7857 -0.0444 0.0902 0.089 Uiso 1 1 calc R . .
H42B H 0.6917 -0.0927 0.1229 0.089 Uiso 1 1 calc R . .
C49 C 0.7932(7) 0.2181(8) 0.1832(4) 0.096(4) Uani 1 1 d . A .
H49A H 0.8463 0.2726 0.1769 0.116 Uiso 1 1 calc R . .
H49B H 0.8041 0.2018 0.2281 0.116 Uiso 1 1 calc R . .
C18 C 0.2996(6) 0.4698(7) 0.1899(5) 0.086(3) Uani 1 1 d . . .
H18A H 0.3332 0.4847 0.1510 0.103 Uiso 1 1 calc R . .
H18B H 0.3220 0.5252 0.2232 0.103 Uiso 1 1 calc R . .
C46 C 0.6038(7) 0.3717(6) 0.0464(4) 0.088(3) Uani 1 1 d . A .
H46A H 0.5515 0.4074 0.0444 0.105 Uiso 1 1 calc R . .
H46B H 0.6655 0.4166 0.0416 0.105 Uiso 1 1 calc R . .
C802 C 0.0747(7) 1.0543(6) 0.0443(4) 0.084(7) Uani 0.418(12) 1 d PR . 1
H802 H 0.1264 1.0898 0.0743 0.101 Uiso 0.418(12) 1 calc PR . 1
C800 C -0.0662(14) 0.9257(18) 0.0194(10) 0.080(7) Uani 0.418(12) 1 d P . 1
H800 H -0.1103 0.8734 0.0332 0.096 Uiso 0.418(12) 1 calc PR . 1
C801 C 0.0065(15) 0.9817(17) 0.0631(10) 0.080(7) Uani 0.418(12) 1 d P . 1
H801 H 0.0091 0.9696 0.1073 0.096 Uiso 0.418(12) 1 calc PR . 1
C52 C 0.9406(9) 0.1887(16) -0.0809(7) 0.115(7) Uani 0.761(4) 1 d P A 3
H52A H 0.9857 0.2176 -0.1113 0.138 Uiso 0.761(4) 1 calc PR A 3
H52B H 0.9247 0.1182 -0.0913 0.138 Uiso 0.761(4) 1 calc PR A 3
C53 C 0.9855(9) 0.2157(19) -0.0115(8) 0.153(10) Uani 0.761(4) 1 d P A 3
H53A H 1.0518 0.2042 -0.0070 0.183 Uiso 0.761(4) 1 calc PR A 3
H53B H 0.9889 0.2844 0.0015 0.183 Uiso 0.761(4) 1 calc PR A 3
C54 C 0.9621(9) 0.1911(14) 0.0964(7) 0.117(7) Uani 0.761(4) 1 d P A 3
H54A H 1.0306 0.1874 0.1047 0.141 Uiso 0.761(4) 1 calc PR A 3
H54B H 0.9573 0.2586 0.1062 0.141 Uiso 0.761(4) 1 calc PR A 3
O19 O 0.9256(5) 0.1569(7) 0.0282(4) 0.087(3) Uani 0.761(4) 1 d P A 3
O18 O 0.8522(5) 0.2264(7) -0.0862(3) 0.067(2) Uani 0.761(4) 1 d P A 3
C152 C 0.929(3) 0.250(2) -0.0727(19) 0.049(9) Uiso 0.239(4) 1 d P A 4
H15G H 0.9323 0.1821 -0.0833 0.059 Uiso 0.239(4) 1 calc PR A 4
H15H H 0.9745 0.2909 -0.0979 0.059 Uiso 0.239(4) 1 calc PR A 4
C153 C 0.949(4) 0.274(4) -0.015(3) 0.113(15) Uiso 0.239(4) 1 d P A 4
H15I H 0.9353 0.3382 -0.0053 0.136 Uiso 0.239(4) 1 calc PR A 4
H15J H 1.0196 0.2808 -0.0043 0.136 Uiso 0.239(4) 1 calc PR A 4
C154 C 0.926(5) 0.218(3) 0.104(3) 0.113(15) Uiso 0.239(4) 1 d PD A 4
H15E H 0.8927 0.2654 0.1243 0.136 Uiso 0.239(4) 1 calc PR A 4
H15F H 0.9963 0.2453 0.1139 0.136 Uiso 0.239(4) 1 calc PR A 4
O119 O 0.9013(13) 0.2124(13) 0.0291(9) 0.037(5) Uiso 0.239(4) 1 d P A 4
O118 O 0.8198(19) 0.2644(18) -0.0883(13) 0.058(7) Uiso 0.239(4) 1 d P A 4
C55 C 0.9019(7) 0.1284(10) 0.1372(5) 0.113(4) Uani 1 1 d D . .
H55A H 0.9340 0.1410 0.1820 0.135 Uiso 1 1 calc R A 3
H55B H 0.9011 0.0610 0.1219 0.135 Uiso 1 1 calc R A 3
C45 C 0.5783(12) 0.3336(8) -0.0651(4) 0.134(6) Uani 1 1 d . A .
H45A H 0.6401 0.3777 -0.0705 0.161 Uiso 1 1 calc R . .
H45B H 0.5262 0.3695 -0.0678 0.161 Uiso 1 1 calc R . .
 
loop_
 _atom_site_aniso_label
 _atom_site_aniso_U_11
 _atom_site_aniso_U_22
 _atom_site_aniso_U_33
 _atom_site_aniso_U_23
 _atom_site_aniso_U_13
 _atom_site_aniso_U_12
Ge2 0.0196(5) 0.0223(7) 0.0271(10) -0.0072(7) 0.0005(6) 0.0039(4)
Ge4 0.0184(7) 0.0287(8) 0.0195(7) 0.0051(5) -0.0001(5) 0.0033(5)
Ge5 0.0175(8) 0.0327(12) 0.0242(10) 0.0015(7) 0.0061(6) 0.0047(7)
Ge6 0.0238(5) 0.0211(6) 0.0284(7) -0.0019(5) -0.0007(5) 0.0046(4)
Ge8 0.0314(6) 0.0262(6) 0.0337(7) 0.0099(5) 0.0072(5) 0.0044(4)
Ge9 0.0276(5) 0.0352(8) 0.0194(4) -0.0008(4) 0.0030(3) -0.0039(4)
Ge12 0.061(4) 0.048(3) 0.048(5) 0.006(3) -0.008(3) 0.011(3)
Ge14 0.048(5) 0.063(5) 0.060(8) 0.010(4) 0.006(4) 0.033(4)
Ge15 0.027(3) 0.054(8) 0.051(8) 0.019(5) 0.014(5) 0.016(4)
Ge16 0.095(5) 0.057(4) 0.091(6) -0.014(3) -0.057(4) 0.038(4)
Ge18 0.048(2) 0.055(3) 0.069(4) 0.010(3) 0.011(3) -0.0133(19)
Ge19 0.0515(19) 0.050(3) 0.0448(19) 0.0107(17) 0.0005(14) 0.0221(18)
Ge1 0.0284(3) 0.0270(3) 0.0379(3) 0.0031(3) 0.0001(2) 0.0100(2)
Ge3 0.0227(3) 0.0409(3) 0.0363(3) 0.0044(3) 0.0082(2) 0.0075(2)
Ge7 0.0251(3) 0.0343(3) 0.0433(4) 0.0013(3) -0.0054(3) 0.0006(2)
K13 0.0247(5) 0.0230(5) 0.0242(6) 0.0026(5) 0.0023(4) 0.0028(4)
K11 0.0225(5) 0.0299(6) 0.0330(7) 0.0064(5) 0.0034(5) 0.0067(5)
K12 0.0576(9) 0.0516(9) 0.0328(8) 0.0105(6) 0.0013(6) -0.0172(7)
O3 0.0254(19) 0.036(2) 0.037(2) -0.0024(18) 0.0008(17) 0.0043(16)
O6 0.039(2) 0.032(2) 0.046(3) -0.0054(19) -0.0025(19) 0.0073(18)
O10 0.033(2) 0.0280(19) 0.032(2) 0.0019(16) 0.0039(17) 0.0078(16)
O8 0.0287(19) 0.0271(19) 0.034(2) 0.0036(17) 0.0018(16) -0.0016(15)
O11 0.0234(18) 0.046(2) 0.024(2) 0.0021(17) 0.0013(15) 0.0083(16)
O7 0.039(2) 0.0252(19) 0.029(2) 0.0043(16) 0.0037(17) 0.0065(16)
O4 0.026(2) 0.030(2) 0.051(3) 0.0087(19) 0.0066(18) -0.0005(16)
O1 0.032(2) 0.041(2) 0.053(3) 0.003(2) 0.0036(19) 0.0188(18)
O9 0.031(2) 0.028(2) 0.035(2) 0.0033(17) 0.0021(17) 0.0082(16)
O13 0.0247(19) 0.038(2) 0.025(2) 0.0067(17) -0.0001(15) 0.0003(16)
N13 0.025(2) 0.033(2) 0.030(3) 0.000(2) -0.0013(19) -0.0006(19)
O5 0.036(2) 0.079(3) 0.040(3) -0.011(2) 0.0063(19) 0.017(2)
O2 0.051(3) 0.054(3) 0.071(3) 0.027(3) -0.010(2) 0.009(2)
N12 0.024(2) 0.042(3) 0.040(3) 0.003(2) 0.006(2) 0.002(2)
O14 0.048(3) 0.050(3) 0.039(3) -0.002(2) 0.001(2) 0.001(2)
C33 0.046(3) 0.026(3) 0.035(3) 0.006(2) 0.009(3) 0.007(2)
C31 0.051(4) 0.033(3) 0.022(3) 0.005(2) 0.003(3) 0.014(3)
C27 0.024(3) 0.034(3) 0.049(4) -0.001(3) 0.007(3) 0.007(2)
C20 0.035(3) 0.058(4) 0.025(3) 0.001(3) 0.000(2) 0.003(3)
C36 0.041(3) 0.038(3) 0.044(4) -0.003(3) -0.011(3) 0.001(3)
C26 0.033(3) 0.038(3) 0.042(4) 0.009(3) 0.005(3) 0.009(3)
C19 0.032(3) 0.051(4) 0.025(3) 0.003(3) -0.005(2) 0.008(3)
C28 0.029(3) 0.032(3) 0.044(4) -0.005(3) 0.012(3) 0.005(2)
C22 0.023(3) 0.051(4) 0.035(3) 0.014(3) 0.006(2) 0.006(3)
C35 0.038(3) 0.030(3) 0.058(4) 0.003(3) -0.008(3) -0.001(3)
C32 0.049(4) 0.030(3) 0.032(3) 0.009(3) 0.005(3) 0.010(3)
C21 0.029(3) 0.059(4) 0.032(3) 0.006(3) 0.008(3) 0.012(3)
C25 0.024(3) 0.043(3) 0.036(3) 0.006(3) -0.002(2) 0.003(2)
C24 0.035(3) 0.035(3) 0.030(3) -0.001(2) -0.009(2) 0.006(2)
C23 0.026(3) 0.033(3) 0.038(3) 0.003(3) -0.005(2) -0.001(2)
C29 0.064(4) 0.035(3) 0.031(3) -0.001(3) -0.001(3) 0.018(3)
C34 0.038(3) 0.020(3) 0.043(3) 0.005(2) 0.012(3) 0.000(2)
C13 0.025(3) 0.064(4) 0.044(4) 0.005(3) 0.012(3) 0.005(3)
C4 0.029(3) 0.038(3) 0.038(3) -0.009(3) -0.002(3) 0.010(2)
C9 0.054(4) 0.073(5) 0.055(5) -0.035(4) -0.014(3) 0.034(4)
C6 0.035(3) 0.058(4) 0.038(4) -0.003(3) 0.014(3) 0.005(3)
C5 0.035(3) 0.051(4) 0.028(3) -0.001(3) 0.006(3) 0.004(3)
C12 0.033(3) 0.043(4) 0.051(4) 0.018(3) 0.005(3) -0.001(3)
C11 0.043(3) 0.026(3) 0.050(4) 0.008(3) -0.005(3) -0.004(3)
C40 0.067(4) 0.028(3) 0.047(4) -0.003(3) 0.020(3) 0.003(3)
C3 0.022(3) 0.034(3) 0.063(4) -0.012(3) -0.007(3) 0.001(2)
C15 0.052(4) 0.043(4) 0.063(5) -0.010(3) -0.019(3) 0.030(3)
C14 0.027(3) 0.057(4) 0.058(4) -0.006(3) 0.005(3) 0.014(3)
C2 0.029(3) 0.038(3) 0.079(5) 0.024(3) 0.007(3) 0.000(3)
C41 0.058(4) 0.039(4) 0.072(5) -0.007(4) 0.018(4) 0.009(3)
C17 0.056(5) 0.115(7) 0.091(7) 0.078(6) 0.006(5) 0.011(5)
C16 0.057(4) 0.046(4) 0.054(4) 0.007(3) -0.013(3) 0.024(3)
O15 0.058(3) 0.056(3) 0.043(3) 0.016(2) 0.005(2) 0.009(2)
O17 0.094(4) 0.056(3) 0.034(3) -0.008(2) 0.020(3) -0.027(3)
O16 0.141(6) 0.058(3) 0.039(3) -0.002(3) 0.008(3) 0.033(3)
N15 0.096(5) 0.068(4) 0.037(3) 0.006(3) 0.008(3) 0.024(4)
N16 0.065(4) 0.104(6) 0.038(4) -0.003(4) -0.011(3) -0.021(4)
N14 0.040(3) 0.027(2) 0.026(2) 0.0020(19) -0.002(2) 0.009(2)
N11 0.036(3) 0.095(5) 0.054(4) 0.040(4) 0.009(3) 0.009(3)
C30 0.057(4) 0.027(3) 0.032(3) -0.005(3) -0.009(3) 0.011(3)
C50 0.119(8) 0.055(5) 0.033(4) 0.011(3) 0.011(4) -0.012(5)
C10 0.054(4) 0.043(4) 0.049(4) -0.016(3) -0.013(3) 0.011(3)
C8 0.043(4) 0.122(8) 0.047(5) -0.013(5) 0.016(3) 0.016(5)
C1 0.032(3) 0.073(5) 0.064(5) 0.036(4) 0.011(3) -0.002(3)
C156 0.070(5) 0.090(6) 0.043(4) 0.030(4) -0.014(4) -0.006(4)
C7 0.048(5) 0.176(11) 0.034(4) 0.029(6) 0.016(3) 0.009(6)
C39 0.036(4) 0.107(6) 0.037(4) 0.009(4) -0.007(3) 0.011(4)
C38 0.084(6) 0.072(5) 0.028(4) 0.001(4) -0.006(4) 0.014(4)
C47 0.122(8) 0.053(5) 0.040(5) -0.015(4) 0.006(5) -0.019(5)
C51 0.098(7) 0.113(8) 0.048(5) 0.011(5) 0.027(5) -0.030(6)
C44 0.146(9) 0.114(8) 0.043(5) 0.015(5) -0.003(5) 0.085(7)
C48 0.114(8) 0.076(6) 0.028(4) -0.008(4) 0.005(4) -0.028(5)
C42 0.073(5) 0.105(7) 0.053(5) 0.037(5) -0.002(4) 0.031(5)
C49 0.081(7) 0.133(9) 0.040(5) 0.002(5) -0.018(4) -0.041(6)
C18 0.054(5) 0.113(7) 0.099(7) 0.081(6) 0.014(5) 0.008(5)
C46 0.138(9) 0.049(5) 0.067(6) -0.009(4) 0.010(6) 0.006(5)
C802 0.054(12) 0.12(2) 0.070(15) -0.011(14) -0.008(11) 0.011(13)
C800 0.055(12) 0.115(19) 0.062(13) -0.024(12) 0.010(10) 0.012(12)
C801 0.076(14) 0.111(18) 0.049(12) -0.025(12) -0.015(10) 0.035(13)
C52 0.050(7) 0.22(2) 0.064(9) 0.000(11) 0.033(6) -0.005(10)
C53 0.041(7) 0.30(3) 0.098(12) 0.086(15) 0.005(7) -0.032(11)
C54 0.043(7) 0.214(19) 0.060(8) 0.011(10) -0.013(6) -0.039(9)
O19 0.035(4) 0.126(8) 0.092(6) 0.044(6) -0.005(4) -0.008(4)
O18 0.045(4) 0.105(7) 0.050(4) 0.017(4) 0.010(3) 0.005(4)
C55 0.062(6) 0.189(12) 0.061(6) 0.021(7) -0.012(5) -0.026(7)
C45 0.292(18) 0.110(8) 0.043(5) 0.020(5) 0.026(8) 0.129(11)
 
_geom_special_details
;
 All esds (except the esd in the dihedral angle between two l.s. planes)
 are estimated using the full covariance matrix.  The cell esds are taken
 into account individually in the estimation of esds in distances, angles
 and torsion angles; correlations between esds in cell parameters are only
 used when they are defined by crystal symmetry.  An approximate (isotropic)
 treatment of cell esds is used for estimating esds involving l.s. planes.
;
 
loop_
 _geom_bond_atom_site_label_1
 _geom_bond_atom_site_label_2
 _geom_bond_distance
 _geom_bond_site_symmetry_2
 _geom_bond_publ_flag
Ge2 Ge8 2.573(2) . ?
Ge2 Ge4 2.607(4) . ?
Ge2 Ge1 2.610(2) . ?
Ge2 Ge3 2.778(2) . ?
Ge2 Ge5 2.845(6) . ?
Ge4 Ge6 2.560(5) . ?
Ge4 Ge3 2.587(4) . ?
Ge4 Ge5 2.617(7) . ?
Ge5 Ge7 2.552(5) . ?
Ge5 Ge1 2.614(7) . ?
Ge5 Ge6 2.753(4) . ?
Ge6 Ge9 2.5739(17) . ?
Ge6 Ge7 2.6867(18) . ?
Ge6 Ge3 2.9070(17) . ?
Ge8 Ge9 2.5047(14) . ?
Ge8 Ge1 2.6539(13) . ?
Ge8 Ge3 2.6579(13) . ?
Ge9 C903 2.044(11) . ?
Ge9 Ge7 2.5188(11) . ?
Ge9 Ge3 2.5404(12) . ?
C905 C904 1.320(19) . ?
C905 C902 1.489(18) . ?
C905 H90A 0.9900 . ?
C905 H90B 0.9900 . ?
C904 H90C 0.9800 . ?
C904 H90D 0.9800 . ?
C904 H90E 0.9800 . ?
C903 C902 1.356(16) . ?
C903 C901 1.558(9) . ?
C902 H902 0.9500 . ?
C901 H90F 0.9800 . ?
C901 H90G 0.9800 . ?
C901 H90I 0.9800 . ?
Ge12 Ge14 2.452(18) . ?
Ge12 Ge18 2.530(9) . ?
Ge12 Ge15 2.54(2) . ?
Ge12 Ge1 2.760(11) . ?
Ge14 Ge3 2.444(14) . ?
Ge14 Ge16 2.491(18) . ?
Ge14 Ge15 2.66(2) . ?
Ge15 Ge1 2.57(2) . ?
Ge15 Ge7 2.798(18) . ?
Ge16 Ge7 2.450(8) . ?
Ge16 Ge3 2.676(10) . ?
Ge16 Ge19 2.729(8) . ?
Ge18 Ge19 2.565(7) . ?
Ge18 Ge3 2.665(6) . ?
Ge18 Ge1 2.673(5) . ?
Ge19 C702 2.19(2) . ?
Ge19 Ge7 2.511(4) . ?
Ge19 Ge1 2.830(5) . ?
Ge19 Ge3 2.888(4) . ?
C703 C702 1.341(10) . ?
C703 C705 1.503(10) . ?
C702 C701 1.469(10) . ?
C701 C704 1.512(10) . ?
Ge1 Ge7 2.6246(8) . ?
K13 O8 2.758(4) . ?
K13 O7 2.784(4) . ?
K13 O10 2.786(4) . ?
K13 O11 2.809(4) . ?
K13 O9 2.855(4) . ?
K13 O13 2.860(4) . ?
K13 N13 2.957(4) . ?
K13 N14 3.019(5) . ?
K11 O1 2.788(4) . ?
K11 O3 2.817(4) . ?
K11 O2 2.840(4) . ?
K11 O5 2.856(4) . ?
K11 O6 2.877(4) . ?
K11 O4 2.878(4) . ?
K11 N12 2.987(5) . ?
K11 N11 3.006(6) . ?
K12 O119 2.512(19) . ?
K12 O118 2.79(3) . ?
K12 O17 2.815(5) . ?
K12 O18 2.836(7) . ?
K12 O15 2.841(5) . ?
K12 O14 2.854(4) . ?
K12 O16 2.927(6) . ?
K12 O19 2.960(8) . ?
K12 N15 2.965(6) . ?
K12 N16 3.018(7) . ?
K12 C154 3.34(7) . ?
K12 C153 3.36(6) . ?
O3 C4 1.424(6) . ?
O3 C5 1.425(7) . ?
O6 C10 1.414(7) . ?
O6 C11 1.428(7) . ?
O10 C29 1.417(7) . ?
O10 C28 1.432(6) . ?
O8 C35 1.423(7) . ?
O8 C34 1.430(6) . ?
O11 C20 1.417(6) . ?
O11 C21 1.445(7) . ?
O7 C32 1.416(7) . ?
O7 C33 1.424(6) . ?
O4 C2 1.413(7) . ?
O4 C3 1.416(7) . ?
O1 C14 1.408(8) . ?
O1 C15 1.434(8) . ?
O9 C27 1.420(6) . ?
O9 C26 1.426(7) . ?
O13 C23 1.418(6) . ?
O13 C22 1.426(6) . ?
N13 C19 1.471(7) . ?
N13 C25 1.474(7) . ?
N13 C36 1.478(7) . ?
O5 C9 1.425(9) . ?
O5 C8 1.428(8) . ?
O2 C16 1.411(8) . ?
O2 C17 1.444(10) . ?
N12 C12 1.465(8) . ?
N12 C13 1.469(7) . ?
N12 C6 1.475(8) . ?
O14 C39 1.421(8) . ?
O14 C40 1.426(7) . ?
C33 C34 1.485(8) . ?
C33 H33A 0.9900 . ?
C33 H33B 0.9900 . ?
C31 N14 1.471(7) . ?
C31 C32 1.519(8) . ?
C31 H31A 0.9900 . ?
C31 H31B 0.9900 . ?
C27 C28 1.479(8) . ?
C27 H27A 0.9900 . ?
C27 H27B 0.9900 . ?
C20 C19 1.504(8) . ?
C20 H20A 0.9900 . ?
C20 H20B 0.9900 . ?
C36 C35 1.502(9) . ?
C36 H36A 0.9900 . ?
C36 H36B 0.9900 . ?
C26 C25 1.495(8) . ?
C26 H26A 0.9900 . ?
C26 H26B 0.9900 . ?
C19 H19A 0.9900 . ?
C19 H19B 0.9900 . ?
C28 H28A 0.9900 . ?
C28 H28B 0.9900 . ?
C22 C21 1.487(8) . ?
C22 H22A 0.9900 . ?
C22 H22B 0.9900 . ?
C35 H35A 0.9900 . ?
C35 H35B 0.9900 . ?
C32 H32A 0.9900 . ?
C32 H32B 0.9900 . ?
C21 H21A 0.9900 . ?
C21 H21B 0.9900 . ?
C25 H25A 0.9900 . ?
C25 H25B 0.9900 . ?
C24 N14 1.470(7) . ?
C24 C23 1.500(8) . ?
C24 H24A 0.9900 . ?
C24 H24B 0.9900 . ?
C23 H23A 0.9900 . ?
C23 H23B 0.9900 . ?
C29 C30 1.501(9) . ?
C29 H29A 0.9900 . ?
C29 H29B 0.9900 . ?
C34 H34A 0.9900 . ?
C34 H34B 0.9900 . ?
C13 C14 1.502(9) . ?
C13 H13A 0.9900 . ?
C13 H13B 0.9900 . ?
C4 C3 1.493(9) . ?
C4 H4A 0.9900 . ?
C4 H4B 0.9900 . ?
C9 C10 1.486(10) . ?
C9 H9A 0.9900 . ?
C9 H9B 0.9900 . ?
C6 C5 1.510(8) . ?
C6 H6A 0.9900 . ?
C6 H6B 0.9900 . ?
C5 H5A 0.9900 . ?
C5 H5B 0.9900 . ?
C12 C11 1.490(9) . ?
C12 H12A 0.9900 . ?
C12 H12B 0.9900 . ?
C11 H11A 0.9900 . ?
C11 H11B 0.9900 . ?
C40 C41 1.508(10) . ?
C40 H40A 0.9900 . ?
C40 H40B 0.9900 . ?
C3 H3A 0.9900 . ?
C3 H3B 0.9900 . ?
C15 C16 1.448(10) . ?
C15 H15A 0.9900 . ?
C15 H15B 0.9900 . ?
C14 H14A 0.9900 . ?
C14 H14B 0.9900 . ?
C2 C1 1.501(10) . ?
C2 H2A 0.9900 . ?
C2 H2B 0.9900 . ?
C41 O15 1.422(8) . ?
C41 H41A 0.9900 . ?
C41 H41B 0.9900 . ?
C17 C18 1.526(11) . ?
C17 H17A 0.9900 . ?
C17 H17B 0.9900 . ?
C16 H16A 0.9900 . ?
C16 H16B 0.9900 . ?
O15 C42 1.439(8) . ?
O17 C47 1.395(11) . ?
O17 C48 1.413(9) . ?
O16 C46 1.426(9) . ?
O16 C45 1.435(10) . ?
N15 C44 1.447(11) . ?
N15 C38 1.481(9) . ?
N15 C50 1.504(10) . ?
N16 C49 1.430(13) . ?
N16 C156 1.440(10) . ?
N16 C55 1.514(12) . ?
N14 C30 1.481(7) . ?
N11 C7 1.472(12) . ?
N11 C18 1.473(10) . ?
N11 C1 1.481(8) . ?
C30 H30A 0.9900 . ?
C30 H30B 0.9900 . ?
C50 C51 1.495(14) . ?
C50 H50A 0.9900 . ?
C50 H50B 0.9900 . ?
C10 H10A 0.9900 . ?
C10 H10B 0.9900 . ?
C8 C7 1.503(13) . ?
C8 H8A 0.9900 . ?
C8 H8B 0.9900 . ?
C1 H1A 0.9900 . ?
C1 H1B 0.9900 . ?
C156 C42 1.460(12) . ?
C156 H15C 0.9900 . ?
C156 H15D 0.9900 . ?
C7 H7A 0.9900 . ?
C7 H7B 0.9900 . ?
C39 C38 1.517(10) . ?
C39 H39A 0.9900 . ?
C39 H39B 0.9900 . ?
C38 H38A 0.9900 . ?
C38 H38B 0.9900 . ?
C47 C46 1.516(11) . ?
C47 H47A 0.9900 . ?
C47 H47B 0.9900 . ?
C51 O118 1.30(3) . ?
C51 O18 1.392(12) . ?
C51 H51A 0.9900 . ?
C51 H51B 0.9900 . ?
C44 C45 1.558(13) . ?
C44 H44A 0.9900 . ?
C44 H44B 0.9900 . ?
C48 C49 1.491(14) . ?
C48 H48A 0.9900 . ?
C48 H48B 0.9900 . ?
C42 H42A 0.9900 . ?
C42 H42B 0.9900 . ?
C49 H49A 0.9900 . ?
C49 H49B 0.9900 . ?
C18 H18A 0.9900 . ?
C18 H18B 0.9900 . ?
C46 H46A 0.9900 . ?
C46 H46B 0.9900 . ?
C802 C801 1.37(3) . ?
C802 C800 1.38(2) 2_575 ?
C802 H802 0.9500 . ?
C800 C802 1.38(2) 2_575 ?
C800 C801 1.38(3) . ?
C800 H800 0.9500 . ?
C801 H801 0.9500 . ?
C52 O18 1.472(18) . ?
C52 C53 1.52(2) . ?
C52 H52A 0.9900 . ?
C52 H52B 0.9900 . ?
C53 O19 1.432(15) . ?
C53 H53A 0.9900 . ?
C53 H53B 0.9900 . ?
C54 C55 1.476(16) . ?
C54 O19 1.477(16) . ?
C54 H54A 0.9900 . ?
C54 H54B 0.9900 . ?
C152 C153 1.23(6) . ?
C152 O118 1.63(4) . ?
C152 H15G 0.9900 . ?
C152 H15H 0.9900 . ?
C153 O119 1.43(6) . ?
C153 H15I 0.9900 . ?
C153 H15J 0.9900 . ?
C154 O119 1.56(7) . ?
C154 C55 1.501(10) . ?
C154 H15E 0.9900 . ?
C154 H15F 0.9900 . ?
C55 H55A 0.9900 . ?
C55 H55B 0.9900 . ?
C45 H45A 0.9900 . ?
C45 H45B 0.9900 . ?
 
loop_
 _geom_angle_atom_site_label_1
 _geom_angle_atom_site_label_2
 _geom_angle_atom_site_label_3
 _geom_angle
 _geom_angle_site_symmetry_1
 _geom_angle_site_symmetry_3
 _geom_angle_publ_flag
Ge8 Ge2 Ge4 111.83(13) . . ?
Ge8 Ge2 Ge1 61.61(6) . . ?
Ge4 Ge2 Ge1 109.26(12) . . ?
Ge8 Ge2 Ge3 59.42(5) . . ?
Ge4 Ge2 Ge3 57.34(10) . . ?
Ge1 Ge2 Ge3 101.13(8) . . ?
Ge8 Ge2 Ge5 102.16(14) . . ?
Ge4 Ge2 Ge5 57.17(15) . . ?
Ge1 Ge2 Ge5 57.08(14) . . ?
Ge3 Ge2 Ge5 90.68(11) . . ?
Ge6 Ge4 Ge3 68.76(11) . . ?
Ge6 Ge4 Ge2 100.73(15) . . ?
Ge3 Ge4 Ge2 64.66(9) . . ?
Ge6 Ge4 Ge5 64.23(13) . . ?
Ge3 Ge4 Ge5 100.4(2) . . ?
Ge2 Ge4 Ge5 66.01(17) . . ?
Ge7 Ge5 Ge1 61.05(15) . . ?
Ge7 Ge5 Ge4 112.2(2) . . ?
Ge1 Ge5 Ge4 108.8(2) . . ?
Ge7 Ge5 Ge6 60.72(10) . . ?
Ge1 Ge5 Ge6 101.66(19) . . ?
Ge4 Ge5 Ge6 56.89(14) . . ?
Ge7 Ge5 Ge2 101.8(2) . . ?
Ge1 Ge5 Ge2 56.92(13) . . ?
Ge4 Ge5 Ge2 56.82(14) . . ?
Ge6 Ge5 Ge2 90.59(17) . . ?
Ge4 Ge6 Ge9 102.90(9) . . ?
Ge4 Ge6 Ge7 109.67(11) . . ?
Ge9 Ge6 Ge7 57.17(4) . . ?
Ge4 Ge6 Ge5 58.89(15) . . ?
Ge9 Ge6 Ge5 91.51(15) . . ?
Ge7 Ge6 Ge5 55.95(14) . . ?
Ge4 Ge6 Ge3 56.06(7) . . ?
Ge9 Ge6 Ge3 54.82(4) . . ?
Ge7 Ge6 Ge3 100.31(5) . . ?
Ge5 Ge6 Ge3 89.90(13) . . ?
Ge9 Ge8 Ge2 97.36(7) . . ?
Ge9 Ge8 Ge1 80.91(5) . . ?
Ge2 Ge8 Ge1 59.88(6) . . ?
Ge9 Ge8 Ge3 58.87(4) . . ?
Ge2 Ge8 Ge3 64.13(6) . . ?
Ge1 Ge8 Ge3 103.18(4) . . ?
C903 Ge9 Ge8 126.7(3) . . ?
C903 Ge9 Ge7 124.1(3) . . ?
Ge8 Ge9 Ge7 102.22(6) . . ?
C903 Ge9 Ge3 109.4(3) . . ?
Ge8 Ge9 Ge3 63.58(4) . . ?
Ge7 Ge9 Ge3 116.28(4) . . ?
C903 Ge9 Ge6 107.9(3) . . ?
Ge8 Ge9 Ge6 115.99(6) . . ?
Ge7 Ge9 Ge6 63.67(4) . . ?
Ge3 Ge9 Ge6 69.27(5) . . ?
C904 C905 C902 108.2(14) . . ?
C904 C905 H90A 110.1 . . ?
C902 C905 H90A 110.1 . . ?
C904 C905 H90B 110.1 . . ?
C902 C905 H90B 110.1 . . ?
H90A C905 H90B 108.4 . . ?
C905 C904 H90C 109.5 . . ?
C905 C904 H90D 109.5 . . ?
H90C C904 H90D 109.5 . . ?
C905 C904 H90E 109.5 . . ?
H90C C904 H90E 109.5 . . ?
H90D C904 H90E 109.5 . . ?
C902 C903 C901 117.6(11) . . ?
C902 C903 Ge9 119.7(9) . . ?
C901 C903 Ge9 122.5(9) . . ?
C903 C902 C905 122.1(13) . . ?
C903 C902 H902 119.0 . . ?
C905 C902 H902 119.0 . . ?
C903 C901 H90F 109.5 . . ?
C903 C901 H90G 109.5 . . ?
H90F C901 H90G 109.5 . . ?
C903 C901 H90I 109.5 . . ?
H90F C901 H90I 109.5 . . ?
H90G C901 H90I 109.5 . . ?
Ge14 Ge12 Ge18 106.3(5) . . ?
Ge14 Ge12 Ge15 64.2(6) . . ?
Ge18 Ge12 Ge15 110.3(6) . . ?
Ge14 Ge12 Ge1 105.3(5) . . ?
Ge18 Ge12 Ge1 60.5(2) . . ?
Ge15 Ge12 Ge1 57.9(6) . . ?
Ge3 Ge14 Ge12 75.7(5) . . ?
Ge3 Ge14 Ge16 65.7(4) . . ?
Ge12 Ge14 Ge16 104.0(6) . . ?
Ge3 Ge14 Ge15 109.1(7) . . ?
Ge12 Ge14 Ge15 59.6(6) . . ?
Ge16 Ge14 Ge15 75.0(6) . . ?
Ge12 Ge15 Ge1 65.2(6) . . ?
Ge12 Ge15 Ge14 56.2(6) . . ?
Ge1 Ge15 Ge14 104.9(8) . . ?
Ge12 Ge15 Ge7 106.2(7) . . ?
Ge1 Ge15 Ge7 58.3(5) . . ?
Ge14 Ge15 Ge7 97.2(6) . . ?
Ge7 Ge16 Ge14 111.8(5) . . ?
Ge7 Ge16 Ge3 113.8(3) . . ?
Ge14 Ge16 Ge3 56.3(4) . . ?
Ge7 Ge16 Ge19 57.71(17) . . ?
Ge14 Ge16 Ge19 105.5(4) . . ?
Ge3 Ge16 Ge19 64.6(2) . . ?
Ge12 Ge18 Ge19 101.7(3) . . ?
Ge12 Ge18 Ge3 70.6(3) . . ?
Ge19 Ge18 Ge3 67.02(15) . . ?
Ge12 Ge18 Ge1 64.0(3) . . ?
Ge19 Ge18 Ge1 65.37(18) . . ?
Ge3 Ge18 Ge1 102.48(16) . . ?
C702 Ge19 Ge7 113.0(9) . . ?
C702 Ge19 Ge18 133.4(9) . . ?
Ge7 Ge19 Ge18 113.36(17) . . ?
C702 Ge19 Ge16 98.6(8) . . ?
Ge7 Ge19 Ge16 55.6(2) . . ?
Ge18 Ge19 Ge16 103.3(3) . . ?
C702 Ge19 Ge1 161.8(7) . . ?
Ge7 Ge19 Ge1 58.50(8) . . ?
Ge18 Ge19 Ge1 59.15(14) . . ?
Ge16 Ge19 Ge1 89.2(2) . . ?
C702 Ge19 Ge3 104.7(7) . . ?
Ge7 Ge19 Ge3 105.25(16) . . ?
Ge18 Ge19 Ge3 58.14(15) . . ?
Ge16 Ge19 Ge3 56.8(2) . . ?
Ge1 Ge19 Ge3 93.41(10) . . ?
C702 C703 C705 125.4(14) . . ?
C703 C702 C701 124.0(13) . . ?
C703 C702 Ge19 105.7(13) . . ?
C701 C702 Ge19 130.2(14) . . ?
C702 C701 C704 114.4(11) . . ?
Ge15 Ge1 Ge2 64.3(5) . . ?
Ge15 Ge1 Ge5 7.5(4) . . ?
Ge2 Ge1 Ge5 66.00(14) . . ?
Ge15 Ge1 Ge7 65.1(3) . . ?
Ge2 Ge1 Ge7 106.47(6) . . ?
Ge5 Ge1 Ge7 58.30(10) . . ?
Ge15 Ge1 Ge8 109.9(4) . . ?
Ge2 Ge1 Ge8 58.51(5) . . ?
Ge5 Ge1 Ge8 106.40(12) . . ?
Ge7 Ge1 Ge8 95.59(4) . . ?
Ge15 Ge1 Ge18 105.0(5) . . ?
Ge2 Ge1 Ge18 46.61(16) . . ?
Ge5 Ge1 Ge18 103.34(18) . . ?
Ge7 Ge1 Ge18 106.39(15) . . ?
Ge8 Ge1 Ge18 14.62(15) . . ?
Ge15 Ge1 Ge12 56.8(5) . . ?
Ge2 Ge1 Ge12 8.9(2) . . ?
Ge5 Ge1 Ge12 59.2(2) . . ?
Ge7 Ge1 Ge12 105.0(2) . . ?
Ge8 Ge1 Ge12 67.21(19) . . ?
Ge18 Ge1 Ge12 55.5(2) . . ?
Ge15 Ge1 Ge19 97.5(4) . . ?
Ge2 Ge1 Ge19 83.96(9) . . ?
Ge5 Ge1 Ge19 90.60(16) . . ?
Ge7 Ge1 Ge19 54.66(11) . . ?
Ge8 Ge1 Ge19 42.23(8) . . ?
Ge18 Ge1 Ge19 55.48(16) . . ?
Ge12 Ge1 Ge19 90.0(2) . . ?
Ge14 Ge3 Ge9 99.0(3) . . ?
Ge14 Ge3 Ge4 4.5(4) . . ?
Ge9 Ge3 Ge4 103.08(9) . . ?
Ge14 Ge3 Ge8 109.3(4) . . ?
Ge9 Ge3 Ge8 57.56(4) . . ?
Ge4 Ge3 Ge8 109.72(10) . . ?
Ge14 Ge3 Ge18 102.5(4) . . ?
Ge9 Ge3 Ge18 70.81(14) . . ?
Ge4 Ge3 Ge18 101.95(17) . . ?
Ge8 Ge3 Ge18 14.64(15) . . ?
Ge14 Ge3 Ge16 58.0(4) . . ?
Ge9 Ge3 Ge16 47.08(18) . . ?
Ge4 Ge3 Ge16 62.5(2) . . ?
Ge8 Ge3 Ge16 94.40(16) . . ?
Ge18 Ge3 Ge16 102.04(19) . . ?
Ge14 Ge3 Ge2 59.6(4) . . ?
Ge9 Ge3 Ge2 91.51(6) . . ?
Ge4 Ge3 Ge2 58.01(10) . . ?
Ge8 Ge3 Ge2 56.44(5) . . ?
Ge18 Ge3 Ge2 45.12(16) . . ?
Ge16 Ge3 Ge2 89.5(2) . . ?
Ge14 Ge3 Ge19 102.2(4) . . ?
Ge9 Ge3 Ge19 15.99(10) . . ?
Ge4 Ge3 Ge19 105.58(11) . . ?
Ge8 Ge3 Ge19 41.62(11) . . ?
Ge18 Ge3 Ge19 54.84(13) . . ?
Ge16 Ge3 Ge19 58.58(16) . . ?
Ge2 Ge3 Ge19 79.97(11) . . ?
Ge14 Ge3 Ge6 50.7(3) . . ?
Ge9 Ge3 Ge6 55.91(4) . . ?
Ge4 Ge3 Ge6 55.18(9) . . ?
Ge8 Ge3 Ge6 101.32(4) . . ?
Ge18 Ge3 Ge6 107.54(11) . . ?
Ge16 Ge3 Ge6 8.8(2) . . ?
Ge2 Ge3 Ge6 88.82(6) . . ?
Ge19 Ge3 Ge6 67.11(10) . . ?
Ge16 Ge7 Ge19 66.7(2) . . ?
Ge16 Ge7 Ge9 49.7(2) . . ?
Ge19 Ge7 Ge9 18.99(12) . . ?
Ge16 Ge7 Ge5 68.6(3) . . ?
Ge19 Ge7 Ge5 99.80(15) . . ?
Ge9 Ge7 Ge5 97.67(13) . . ?
Ge16 Ge7 Ge1 100.5(2) . . ?
Ge19 Ge7 Ge1 66.83(14) . . ?
Ge9 Ge7 Ge1 81.22(4) . . ?
Ge5 Ge7 Ge1 60.65(13) . . ?
Ge16 Ge7 Ge6 9.5(3) . . ?
Ge19 Ge7 Ge6 76.01(13) . . ?
Ge9 Ge7 Ge6 59.16(5) . . ?
Ge5 Ge7 Ge6 63.33(13) . . ?
Ge1 Ge7 Ge6 103.17(4) . . ?
Ge16 Ge7 Ge15 73.0(5) . . ?
Ge19 Ge7 Ge15 99.9(4) . . ?
Ge9 Ge7 Ge15 99.4(4) . . ?
Ge5 Ge7 Ge15 5.0(5) . . ?
Ge1 Ge7 Ge15 56.6(4) . . ?
Ge6 Ge7 Ge15 68.1(4) . . ?
O8 K13 O7 61.87(11) . . ?
O8 K13 O10 140.23(11) . . ?
O7 K13 O10 97.10(11) . . ?
O8 K13 O11 92.46(11) . . ?
O7 K13 O11 133.52(11) . . ?
O10 K13 O11 123.34(11) . . ?
O8 K13 O9 98.42(11) . . ?
O7 K13 O9 117.64(11) . . ?
O10 K13 O9 59.84(11) . . ?
O11 K13 O9 103.21(11) . . ?
O8 K13 O13 110.04(11) . . ?
O7 K13 O13 91.21(11) . . ?
O10 K13 O13 103.29(11) . . ?
O11 K13 O13 60.22(10) . . ?
O9 K13 O13 146.90(11) . . ?
O8 K13 N13 60.78(12) . . ?
O7 K13 N13 121.22(12) . . ?
O10 K13 N13 119.17(12) . . ?
O11 K13 N13 60.65(11) . . ?
O9 K13 N13 60.81(12) . . ?
O13 K13 N13 119.38(12) . . ?
O8 K13 N14 121.21(12) . . ?
O7 K13 N14 60.97(12) . . ?
O10 K13 N14 60.22(11) . . ?
O11 K13 N14 117.62(12) . . ?
O9 K13 N14 119.07(12) . . ?
O13 K13 N14 59.33(12) . . ?
N13 K13 N14 177.75(13) . . ?
O1 K11 O3 98.58(12) . . ?
O1 K11 O2 60.04(13) . . ?
O3 K11 O2 120.71(14) . . ?
O1 K11 O5 119.45(13) . . ?
O3 K11 O5 136.38(13) . . ?
O2 K11 O5 97.76(15) . . ?
O1 K11 O6 97.84(12) . . ?
O3 K11 O6 98.64(12) . . ?
O2 K11 O6 136.01(13) . . ?
O5 K11 O6 58.21(13) . . ?
O1 K11 O4 135.86(12) . . ?
O3 K11 O4 59.37(11) . . ?
O2 K11 O4 96.70(12) . . ?
O5 K11 O4 99.27(12) . . ?
O6 K11 O4 121.57(11) . . ?
O1 K11 N12 60.69(13) . . ?
O3 K11 N12 60.68(12) . . ?
O2 K11 N12 119.95(14) . . ?
O5 K11 N12 118.84(14) . . ?
O6 K11 N12 61.34(13) . . ?
O4 K11 N12 119.53(13) . . ?
O1 K11 N11 119.58(15) . . ?
O3 K11 N11 119.57(15) . . ?
O2 K11 N11 60.40(16) . . ?
O5 K11 N11 60.65(18) . . ?
O6 K11 N11 118.14(17) . . ?
O4 K11 N11 60.65(14) . . ?
N12 K11 N11 179.48(18) . . ?
O119 K12 O118 64.6(7) . . ?
O119 K12 O17 94.7(4) . . ?
O118 K12 O17 116.8(5) . . ?
O119 K12 O18 54.8(5) . . ?
O118 K12 O18 16.1(5) . . ?
O17 K12 O18 126.6(2) . . ?
O119 K12 O15 105.0(5) . . ?
O118 K12 O15 143.5(5) . . ?
O17 K12 O15 98.36(15) . . ?
O18 K12 O15 129.2(2) . . ?
O119 K12 O14 125.1(4) . . ?
O118 K12 O14 96.5(5) . . ?
O17 K12 O14 137.11(15) . . ?
O18 K12 O14 92.56(19) . . ?
O15 K12 O14 59.53(13) . . ?
O119 K12 O16 129.0(5) . . ?
O118 K12 O16 88.8(5) . . ?
O17 K12 O16 58.11(17) . . ?
O18 K12 O16 104.8(2) . . ?
O15 K12 O16 119.98(16) . . ?
O14 K12 O16 99.14(15) . . ?
O119 K12 O19 17.2(4) . . ?
O118 K12 O19 72.3(6) . . ?
O17 K12 O19 105.3(2) . . ?
O18 K12 O19 59.1(2) . . ?
O15 K12 O19 89.8(2) . . ?
O14 K12 O19 110.4(2) . . ?
O16 K12 O19 146.2(2) . . ?
O119 K12 N15 117.4(5) . . ?
O118 K12 N15 53.4(6) . . ?
O17 K12 N15 117.8(2) . . ?
O18 K12 N15 63.0(2) . . ?
O15 K12 N15 119.32(17) . . ?
O14 K12 N15 60.88(16) . . ?
O16 K12 N15 60.38(16) . . ?
O19 K12 N15 120.9(2) . . ?
O119 K12 N16 64.5(5) . . ?
O118 K12 N16 128.4(6) . . ?
O17 K12 N16 60.0(2) . . ?
O18 K12 N16 119.1(2) . . ?
O15 K12 N16 60.65(17) . . ?
O14 K12 N16 119.54(18) . . ?
O16 K12 N16 117.31(19) . . ?
O19 K12 N16 61.5(2) . . ?
N15 K12 N16 177.5(2) . . ?
O119 K12 C154 26.5(10) . . ?
O118 K12 C154 89.0(9) . . ?
O17 K12 C154 74.0(12) . . ?
O18 K12 C154 81.1(9) . . ?
O15 K12 C154 91.5(3) . . ?
O14 K12 C154 136.2(9) . . ?
O16 K12 C154 124.4(10) . . ?
O19 K12 C154 31.4(12) . . ?
N15 K12 C154 142.3(6) . . ?
N16 K12 C154 39.3(7) . . ?
O119 K12 C153 22.8(11) . . ?
O118 K12 C153 42.1(12) . . ?
O17 K12 C153 101.4(11) . . ?
O18 K12 C153 34.8(11) . . ?
O15 K12 C153 124.6(10) . . ?
O14 K12 C153 121.4(11) . . ?
O16 K12 C153 114.4(10) . . ?
O19 K12 C153 35.1(10) . . ?
N15 K12 C153 95.4(11) . . ?
N16 K12 C153 86.4(11) . . ?
C154 K12 C153 47.2(13) . . ?
C4 O3 C5 111.6(4) . . ?
C4 O3 K11 117.3(3) . . ?
C5 O3 K11 117.2(3) . . ?
C10 O6 C11 110.5(5) . . ?
C10 O6 K11 115.4(4) . . ?
C11 O6 K11 113.5(3) . . ?
C29 O10 C28 110.5(4) . . ?
C29 O10 K13 121.3(3) . . ?
C28 O10 K13 117.7(3) . . ?
C35 O8 C34 111.6(4) . . ?
C35 O8 K13 119.7(3) . . ?
C34 O8 K13 115.1(3) . . ?
C20 O11 C21 111.0(4) . . ?
C20 O11 K13 120.6(3) . . ?
C21 O11 K13 111.2(3) . . ?
C32 O7 C33 109.4(4) . . ?
C32 O7 K13 119.2(3) . . ?
C33 O7 K13 111.1(3) . . ?
C2 O4 C3 112.1(5) . . ?
C2 O4 K11 115.0(3) . . ?
C3 O4 K11 112.5(3) . . ?
C14 O1 C15 110.7(5) . . ?
C14 O1 K11 118.0(3) . . ?
C15 O1 K11 115.5(4) . . ?
C27 O9 C26 111.4(4) . . ?
C27 O9 K13 114.5(3) . . ?
C26 O9 K13 117.2(3) . . ?
C23 O13 C22 111.4(4) . . ?
C23 O13 K13 116.0(3) . . ?
C22 O13 K13 115.2(3) . . ?
C19 N13 C25 109.4(4) . . ?
C19 N13 C36 110.7(5) . . ?
C25 N13 C36 108.5(4) . . ?
C19 N13 K13 107.8(3) . . ?
C25 N13 K13 110.7(3) . . ?
C36 N13 K13 109.7(3) . . ?
C9 O5 C8 110.3(6) . . ?
C9 O5 K11 117.7(4) . . ?
C8 O5 K11 115.8(4) . . ?
C16 O2 C17 109.7(5) . . ?
C16 O2 K11 113.9(4) . . ?
C17 O2 K11 115.9(4) . . ?
C12 N12 C13 110.9(5) . . ?
C12 N12 C6 109.8(5) . . ?
C13 N12 C6 109.8(5) . . ?
C12 N12 K11 107.5(3) . . ?
C13 N12 K11 109.2(3) . . ?
C6 N12 K11 109.7(3) . . ?
C39 O14 C40 111.5(5) . . ?
C39 O14 K12 114.9(4) . . ?
C40 O14 K12 115.8(3) . . ?
O7 C33 C34 110.1(4) . . ?
O7 C33 H33A 109.6 . . ?
C34 C33 H33A 109.6 . . ?
O7 C33 H33B 109.6 . . ?
C34 C33 H33B 109.6 . . ?
H33A C33 H33B 108.2 . . ?
N14 C31 C32 113.4(4) . . ?
N14 C31 H31A 108.9 . . ?
C32 C31 H31A 108.9 . . ?
N14 C31 H31B 108.9 . . ?
C32 C31 H31B 108.9 . . ?
H31A C31 H31B 107.7 . . ?
O9 C27 C28 110.8(5) . . ?
O9 C27 H27A 109.5 . . ?
C28 C27 H27A 109.5 . . ?
O9 C27 H27B 109.5 . . ?
C28 C27 H27B 109.5 . . ?
H27A C27 H27B 108.1 . . ?
O11 C20 C19 110.6(5) . . ?
O11 C20 H20A 109.5 . . ?
C19 C20 H20A 109.5 . . ?
O11 C20 H20B 109.5 . . ?
C19 C20 H20B 109.5 . . ?
H20A C20 H20B 108.1 . . ?
N13 C36 C35 113.2(5) . . ?
N13 C36 H36A 108.9 . . ?
C35 C36 H36A 108.9 . . ?
N13 C36 H36B 108.9 . . ?
C35 C36 H36B 108.9 . . ?
H36A C36 H36B 107.8 . . ?
O9 C26 C25 111.2(5) . . ?
O9 C26 H26A 109.4 . . ?
C25 C26 H26A 109.4 . . ?
O9 C26 H26B 109.4 . . ?
C25 C26 H26B 109.4 . . ?
H26A C26 H26B 108.0 . . ?
N13 C19 C20 113.8(5) . . ?
N13 C19 H19A 108.8 . . ?
C20 C19 H19A 108.8 . . ?
N13 C19 H19B 108.8 . . ?
C20 C19 H19B 108.8 . . ?
H19A C19 H19B 107.7 . . ?
O10 C28 C27 110.3(4) . . ?
O10 C28 H28A 109.6 . . ?
C27 C28 H28A 109.6 . . ?
O10 C28 H28B 109.6 . . ?
C27 C28 H28B 109.6 . . ?
H28A C28 H28B 108.1 . . ?
O13 C22 C21 110.0(4) . . ?
O13 C22 H22A 109.7 . . ?
C21 C22 H22A 109.7 . . ?
O13 C22 H22B 109.7 . . ?
C21 C22 H22B 109.7 . . ?
H22A C22 H22B 108.2 . . ?
O8 C35 C36 109.2(5) . . ?
O8 C35 H35A 109.8 . . ?
C36 C35 H35A 109.8 . . ?
O8 C35 H35B 109.8 . . ?
C36 C35 H35B 109.8 . . ?
H35A C35 H35B 108.3 . . ?
O7 C32 C31 109.0(4) . . ?
O7 C32 H32A 109.9 . . ?
C31 C32 H32A 109.9 . . ?
O7 C32 H32B 109.9 . . ?
C31 C32 H32B 109.9 . . ?
H32A C32 H32B 108.3 . . ?
O11 C21 C22 108.2(5) . . ?
O11 C21 H21A 110.1 . . ?
C22 C21 H21A 110.1 . . ?
O11 C21 H21B 110.1 . . ?
C22 C21 H21B 110.1 . . ?
H21A C21 H21B 108.4 . . ?
N13 C25 C26 114.3(4) . . ?
N13 C25 H25A 108.7 . . ?
C26 C25 H25A 108.7 . . ?
N13 C25 H25B 108.7 . . ?
C26 C25 H25B 108.7 . . ?
H25A C25 H25B 107.6 . . ?
N14 C24 C23 113.0(4) . . ?
N14 C24 H24A 109.0 . . ?
C23 C24 H24A 109.0 . . ?
N14 C24 H24B 109.0 . . ?
C23 C24 H24B 109.0 . . ?
H24A C24 H24B 107.8 . . ?
O13 C23 C24 109.5(4) . . ?
O13 C23 H23A 109.8 . . ?
C24 C23 H23A 109.8 . . ?
O13 C23 H23B 109.8 . . ?
C24 C23 H23B 109.8 . . ?
H23A C23 H23B 108.2 . . ?
O10 C29 C30 109.8(5) . . ?
O10 C29 H29A 109.7 . . ?
C30 C29 H29A 109.7 . . ?
O10 C29 H29B 109.7 . . ?
C30 C29 H29B 109.7 . . ?
H29A C29 H29B 108.2 . . ?
O8 C34 C33 109.4(4) . . ?
O8 C34 H34A 109.8 . . ?
C33 C34 H34A 109.8 . . ?
O8 C34 H34B 109.8 . . ?
C33 C34 H34B 109.8 . . ?
H34A C34 H34B 108.2 . . ?
N12 C13 C14 114.4(5) . . ?
N12 C13 H13A 108.6 . . ?
C14 C13 H13A 108.6 . . ?
N12 C13 H13B 108.6 . . ?
C14 C13 H13B 108.6 . . ?
H13A C13 H13B 107.6 . . ?
O3 C4 C3 108.5(5) . . ?
O3 C4 H4A 110.0 . . ?
C3 C4 H4A 110.0 . . ?
O3 C4 H4B 110.0 . . ?
C3 C4 H4B 110.0 . . ?
H4A C4 H4B 108.4 . . ?
O5 C9 C10 109.1(5) . . ?
O5 C9 H9A 109.9 . . ?
C10 C9 H9A 109.9 . . ?
O5 C9 H9B 109.9 . . ?
C10 C9 H9B 109.9 . . ?
H9A C9 H9B 108.3 . . ?
N12 C6 C5 113.9(5) . . ?
N12 C6 H6A 108.8 . . ?
C5 C6 H6A 108.8 . . ?
N12 C6 H6B 108.8 . . ?
C5 C6 H6B 108.8 . . ?
H6A C6 H6B 107.7 . . ?
O3 C5 C6 108.7(5) . . ?
O3 C5 H5A 109.9 . . ?
C6 C5 H5A 109.9 . . ?
O3 C5 H5B 109.9 . . ?
C6 C5 H5B 109.9 . . ?
H5A C5 H5B 108.3 . . ?
N12 C12 C11 115.3(5) . . ?
N12 C12 H12A 108.5 . . ?
C11 C12 H12A 108.5 . . ?
N12 C12 H12B 108.5 . . ?
C11 C12 H12B 108.5 . . ?
H12A C12 H12B 107.5 . . ?
O6 C11 C12 108.7(5) . . ?
O6 C11 H11A 110.0 . . ?
C12 C11 H11A 110.0 . . ?
O6 C11 H11B 110.0 . . ?
C12 C11 H11B 110.0 . . ?
H11A C11 H11B 108.3 . . ?
O14 C40 C41 109.5(6) . . ?
O14 C40 H40A 109.8 . . ?
C41 C40 H40A 109.8 . . ?
O14 C40 H40B 109.8 . . ?
C41 C40 H40B 109.8 . . ?
H40A C40 H40B 108.2 . . ?
O4 C3 C4 109.6(5) . . ?
O4 C3 H3A 109.8 . . ?
C4 C3 H3A 109.8 . . ?
O4 C3 H3B 109.8 . . ?
C4 C3 H3B 109.8 . . ?
H3A C3 H3B 108.2 . . ?
O1 C15 C16 111.0(5) . . ?
O1 C15 H15A 109.4 . . ?
C16 C15 H15A 109.4 . . ?
O1 C15 H15B 109.4 . . ?
C16 C15 H15B 109.4 . . ?
H15A C15 H15B 108.0 . . ?
O1 C14 C13 109.3(5) . . ?
O1 C14 H14A 109.8 . . ?
C13 C14 H14A 109.8 . . ?
O1 C14 H14B 109.8 . . ?
C13 C14 H14B 109.8 . . ?
H14A C14 H14B 108.3 . . ?
O4 C2 C1 109.6(5) . . ?
O4 C2 H2A 109.8 . . ?
C1 C2 H2A 109.8 . . ?
O4 C2 H2B 109.8 . . ?
C1 C2 H2B 109.8 . . ?
H2A C2 H2B 108.2 . . ?
O15 C41 C40 108.4(5) . . ?
O15 C41 H41A 110.0 . . ?
C40 C41 H41A 110.0 . . ?
O15 C41 H41B 110.0 . . ?
C40 C41 H41B 110.0 . . ?
H41A C41 H41B 108.4 . . ?
O2 C17 C18 108.2(7) . . ?
O2 C17 H17A 110.1 . . ?
C18 C17 H17A 110.1 . . ?
O2 C17 H17B 110.1 . . ?
C18 C17 H17B 110.1 . . ?
H17A C17 H17B 108.4 . . ?
O2 C16 C15 110.4(6) . . ?
O2 C16 H16A 109.6 . . ?
C15 C16 H16A 109.6 . . ?
O2 C16 H16B 109.6 . . ?
C15 C16 H16B 109.6 . . ?
H16A C16 H16B 108.1 . . ?
C41 O15 C42 110.2(6) . . ?
C41 O15 K12 114.4(4) . . ?
C42 O15 K12 116.1(5) . . ?
C47 O17 C48 111.0(7) . . ?
C47 O17 K12 120.1(4) . . ?
C48 O17 K12 118.1(5) . . ?
C46 O16 C45 108.4(6) . . ?
C46 O16 K12 113.1(5) . . ?
C45 O16 K12 113.5(6) . . ?
C44 N15 C38 106.6(7) . . ?
C44 N15 C50 111.6(7) . . ?
C38 N15 C50 110.3(6) . . ?
C44 N15 K12 111.1(4) . . ?
C38 N15 K12 110.9(4) . . ?
C50 N15 K12 106.4(5) . . ?
C49 N16 C156 114.3(7) . . ?
C49 N16 C55 110.7(7) . . ?
C156 N16 C55 107.2(8) . . ?
C49 N16 K12 108.6(6) . . ?
C156 N16 K12 108.0(4) . . ?
C55 N16 K12 108.0(5) . . ?
C24 N14 C31 110.6(4) . . ?
C24 N14 C30 109.5(4) . . ?
C31 N14 C30 110.6(4) . . ?
C24 N14 K13 111.7(3) . . ?
C31 N14 K13 106.5(3) . . ?
C30 N14 K13 107.9(3) . . ?
C7 N11 C18 110.3(7) . . ?
C7 N11 C1 110.3(6) . . ?
C18 N11 C1 108.2(6) . . ?
C7 N11 K11 108.8(5) . . ?
C18 N11 K11 110.4(4) . . ?
C1 N11 K11 108.9(4) . . ?
N14 C30 C29 113.8(5) . . ?
N14 C30 H30A 108.8 . . ?
C29 C30 H30A 108.8 . . ?
N14 C30 H30B 108.8 . . ?
C29 C30 H30B 108.8 . . ?
H30A C30 H30B 107.7 . . ?
C51 C50 N15 114.1(7) . . ?
C51 C50 H50A 108.7 . . ?
N15 C50 H50A 108.7 . . ?
C51 C50 H50B 108.7 . . ?
N15 C50 H50B 108.7 . . ?
H50A C50 H50B 107.6 . . ?
O6 C10 C9 109.2(5) . . ?
O6 C10 H10A 109.8 . . ?
C9 C10 H10A 109.8 . . ?
O6 C10 H10B 109.8 . . ?
C9 C10 H10B 109.8 . . ?
H10A C10 H10B 108.3 . . ?
O5 C8 C7 108.0(6) . . ?
O5 C8 H8A 110.1 . . ?
C7 C8 H8A 110.1 . . ?
O5 C8 H8B 110.1 . . ?
C7 C8 H8B 110.1 . . ?
H8A C8 H8B 108.4 . . ?
N11 C1 C2 114.2(6) . . ?
N11 C1 H1A 108.7 . . ?
C2 C1 H1A 108.7 . . ?
N11 C1 H1B 108.7 . . ?
C2 C1 H1B 108.7 . . ?
H1A C1 H1B 107.6 . . ?
N16 C156 C42 117.3(7) . . ?
N16 C156 H15C 108.0 . . ?
C42 C156 H15C 108.0 . . ?
N16 C156 H15D 108.0 . . ?
C42 C156 H15D 108.0 . . ?
H15C C156 H15D 107.2 . . ?
N11 C7 C8 115.5(6) . . ?
N11 C7 H7A 108.4 . . ?
C8 C7 H7A 108.4 . . ?
N11 C7 H7B 108.4 . . ?
C8 C7 H7B 108.4 . . ?
H7A C7 H7B 107.5 . . ?
O14 C39 C38 109.5(6) . . ?
O14 C39 H39A 109.8 . . ?
C38 C39 H39A 109.8 . . ?
O14 C39 H39B 109.8 . . ?
C38 C39 H39B 109.8 . . ?
H39A C39 H39B 108.2 . . ?
N15 C38 C39 113.2(6) . . ?
N15 C38 H38A 108.9 . . ?
C39 C38 H38A 108.9 . . ?
N15 C38 H38B 108.9 . . ?
C39 C38 H38B 108.9 . . ?
H38A C38 H38B 107.7 . . ?
O17 C47 C46 110.0(8) . . ?
O17 C47 H47A 109.7 . . ?
C46 C47 H47A 109.7 . . ?
O17 C47 H47B 109.7 . . ?
C46 C47 H47B 109.7 . . ?
H47A C47 H47B 108.2 . . ?
O118 C51 O18 33.8(10) . . ?
O118 C51 C50 85.8(14) . . ?
O18 C51 C50 116.5(8) . . ?
O118 C51 H51A 135.4 . . ?
O18 C51 H51A 108.2 . . ?
C50 C51 H51A 108.2 . . ?
O118 C51 H51B 107.9 . . ?
O18 C51 H51B 108.2 . . ?
C50 C51 H51B 108.2 . . ?
H51A C51 H51B 107.3 . . ?
N15 C44 C45 112.7(9) . . ?
N15 C44 H44A 109.1 . . ?
C45 C44 H44A 109.1 . . ?
N15 C44 H44B 109.1 . . ?
C45 C44 H44B 109.1 . . ?
H44A C44 H44B 107.8 . . ?
O17 C48 C49 110.0(7) . . ?
O17 C48 H48A 109.7 . . ?
C49 C48 H48A 109.7 . . ?
O17 C48 H48B 109.7 . . ?
C49 C48 H48B 109.7 . . ?
H48A C48 H48B 108.2 . . ?
O15 C42 C156 110.0(7) . . ?
O15 C42 H42A 109.7 . . ?
C156 C42 H42A 109.7 . . ?
O15 C42 H42B 109.7 . . ?
C156 C42 H42B 109.7 . . ?
H42A C42 H42B 108.2 . . ?
N16 C49 C48 114.8(7) . . ?
N16 C49 H49A 108.6 . . ?
C48 C49 H49A 108.6 . . ?
N16 C49 H49B 108.6 . . ?
C48 C49 H49B 108.6 . . ?
H49A C49 H49B 107.5 . . ?
N11 C18 C17 112.4(7) . . ?
N11 C18 H18A 109.1 . . ?
C17 C18 H18A 109.1 . . ?
N11 C18 H18B 109.1 . . ?
C17 C18 H18B 109.1 . . ?
H18A C18 H18B 107.9 . . ?
O16 C46 C47 107.4(6) . . ?
O16 C46 H46A 110.2 . . ?
C47 C46 H46A 110.2 . . ?
O16 C46 H46B 110.2 . . ?
C47 C46 H46B 110.2 . . ?
H46A C46 H46B 108.5 . . ?
C801 C802 C800 118.2(13) . 2_575 ?
C801 C802 H802 120.9 . . ?
C800 C802 H802 120.9 2_575 . ?
C802 C800 C801 120(2) 2_575 . ?
C802 C800 H800 120.0 2_575 . ?
C801 C800 H800 120.0 . . ?
C802 C801 C800 122(2) . . ?
C802 C801 H801 119.1 . . ?
C800 C801 H801 119.1 . . ?
O18 C52 C53 106.3(13) . . ?
O18 C52 H52A 110.5 . . ?
C53 C52 H52A 110.5 . . ?
O18 C52 H52B 110.5 . . ?
C53 C52 H52B 110.5 . . ?
H52A C52 H52B 108.7 . . ?
O19 C53 C52 107.2(13) . . ?
O19 C53 H53A 110.3 . . ?
C52 C53 H53A 110.3 . . ?
O19 C53 H53B 110.3 . . ?
C52 C53 H53B 110.3 . . ?
H53A C53 H53B 108.5 . . ?
C55 C54 O19 107.2(10) . . ?
C55 C54 H54A 110.3 . . ?
O19 C54 H54A 110.3 . . ?
C55 C54 H54B 110.3 . . ?
O19 C54 H54B 110.3 . . ?
H54A C54 H54B 108.5 . . ?
C53 O19 C54 107.4(10) . . ?
C53 O19 K12 112.1(8) . . ?
C54 O19 K12 109.5(8) . . ?
C51 O18 C52 116.5(9) . . ?
C51 O18 K12 115.4(6) . . ?
C52 O18 K12 115.4(7) . . ?
C153 C152 O118 105(4) . . ?
C153 C152 K12 72(3) . . ?
O118 C152 K12 50.1(15) . . ?
C153 C152 H15G 110.8 . . ?
O118 C152 H15G 110.8 . . ?
K12 C152 H15G 88.5 . . ?
C153 C152 H15H 110.8 . . ?
O118 C152 H15H 110.8 . . ?
K12 C152 H15H 159.0 . . ?
H15G C152 H15H 108.9 . . ?
C152 C153 O119 118(5) . . ?
C152 C153 K12 88(4) . . ?
O119 C153 K12 43(2) . . ?
C152 C153 H15I 107.8 . . ?
O119 C153 H15I 107.8 . . ?
K12 C153 H15I 90.7 . . ?
C152 C153 H15J 107.8 . . ?
O119 C153 H15J 107.8 . . ?
K12 C153 H15J 150.4 . . ?
H15I C153 H15J 107.2 . . ?
O119 C154 C55 119(4) . . ?
O119 C154 K12 45.7(19) . . ?
C55 C154 K12 95(3) . . ?
O119 C154 H15E 107.6 . . ?
C55 C154 H15E 107.6 . . ?
K12 C154 H15E 80.5 . . ?
O119 C154 H15F 107.6 . . ?
C55 C154 H15F 107.6 . . ?
K12 C154 H15F 152.4 . . ?
H15E C154 H15F 107.0 . . ?
C153 O119 C154 127(3) . . ?
C153 O119 K12 114(3) . . ?
C154 O119 K12 108(2) . . ?
C51 O118 C152 95(2) . . ?
C51 O118 K12 122.7(15) . . ?
C152 O118 K12 103.2(18) . . ?
C54 C55 C154 28(2) . . ?
C54 C55 N16 117.6(12) . . ?
C154 C55 N16 92(3) . . ?
C54 C55 H55A 107.9 . . ?
C154 C55 H55A 108.9 . . ?
N16 C55 H55A 107.9 . . ?
C54 C55 H55B 107.9 . . ?
C154 C55 H55B 130.7 . . ?
N16 C55 H55B 107.9 . . ?
H55A C55 H55B 107.2 . . ?
O16 C45 C44 106.6(8) . . ?
O16 C45 H45A 110.4 . . ?
C44 C45 H45A 110.4 . . ?
O16 C45 H45B 110.4 . . ?
C44 C45 H45B 110.4 . . ?
H45A C45 H45B 108.6 . . ?
 
_diffrn_measured_fraction_theta_max    1.000
_diffrn_reflns_theta_full              25.00
_diffrn_measured_fraction_theta_full   1.000
_refine_diff_density_max    1.355
_refine_diff_density_min   -0.867
_refine_diff_density_rms    0.103

# start Validation Reply Form

_vrf_PLAT222_ge9-pentyne
;
PROBLEM: Large Non-Solvent    H     Ueq(max)/Ueq(min) ...       6.60 Ratio
RESPONSE: ...
;
_vrf_PLAT242_ge9-pentyne
;
PROBLEM: Check Low       Ueq as Compared to Neighbors for        C55     
RESPONSE: O119 and its neighbors are part of the disordered fragment of one of 
the arms of the crypt.  Due to the disorder and partial occupancy, the Ueq's 
are large for some of the fragments, causing the neighbors to appear "low".
The same is true for C55.
;
_vrf_PLAT410_ge9-pentyne
;
PROBLEM: Short Intra H...H Contact  H49A   ..  H15E    ..       1.43 Ang. 
RESPONSE: H15E is a riding hydrogen on C154, which in turn is part of the the 
disordered frament of one of the arms of the crypt.  The apparent "short 
contact" is an artifact of the disorder.
;
_vrf_PLAT432_ge9-pentyne
;
PROBLEM: Short Inter X...Y Contact  C41    ..  C705    ..       2.57 Ang. 
RESPONSE: C705 (and C704) is part of the minor fragment of the disordered
pentenyl residue.  Due to the disorder and partial occupancy, the two 
carbons appear to have a shorter contact than reality.
;


_vrf_PLAT201_ge9-pentyne
;
PROBLEM:  Isotropic non-H Atoms in Main Residue(s) .......          5  
RESPONSE: The minor fragment of the pentenyl disorder is only 25% occupancy.
As a result, it is impossible to refine anisotropically  such a minor
fragment (25% of a carbon).
;

_vrf_PLAT220_ge9-pentyne
;
PROBLEM:  Large Non-Solvent   Ge     Ueq(max)/Ueq(min) ...       3.70 Ratio  
RESPONSE: The germanium cluster has two positions overall, the minor fragment
of which (25%), is disordered and therefore has large Ueq's.
;

_vrf_PLAT230_ge9-pentyne
;
PROBLEM:  Large Non-Solvent   Ge     Ueq(max)/Ueq(min) ...       3.70 Ratio  
RESPONSE: The germanium cluster has two positions overall, the minor fragment
of which (25%), is disordered and therefore has large Ueq's (and failed
Hirshfeld Test).
;


# end Validation Reply Form
